1 Glycolysis plays an important role in energy transfer from the base to the distal end of the flagellum in  
2 mouse sperm.

3

4 Gen L. Takei\*, Daisuke Miyashiro, Chinatsu Mukai\*\* and Makoto Okuno\*\*\*

5 Department of Life Sciences, Graduate School of Arts and Sciences, The University of Tokyo Komaba  
6 3-8-1, Meguro-ku, Tokyo, 153-8902 Japan

7

8 Present affiliations

9 \*Cardiovascular Physiology, Okayama University Graduate School of Medicine, Dentistry and  
10 Pharmaceutical Science 2-5-1, Shikada-cho, Kita-ku, Okayama-city, Okayama 700-8558 Japan

11 \*\*Baker Institute for Animal Health, College of Veterinary Medicine, Cornell University, Ithaca, NY  
12 14853, USA

13 \*\*\*Department of Biology, Chuo University 1-13-27 Kasuga, Bunkyo-ku, Tokyo 112-8551 Japan

14 \*\*\*Send correspondence to

15

16

17

18 Running title: Glycolysis in mouse sperm flagella

19 Key words: mammalian sperm, motility, glycolysis, energy transport, metabolism, flagellar bending

20

21

22

23

## 24 **Summary**

25           Since many of studies have been conducted to elucidate the relationship between energy  
26           metabolic pathways (glycolysis and respiration) and flagellar motility in mammalian sperm,  
27           contribution of glycolysis to sperm motility has not been fully elucidated yet. In the present study,  
28           we performed detailed analysis of mouse sperm flagellar motility for further understanding of the  
29           contribution of glycolysis to mammalian sperm motility. Mouse sperm maintained vigorous  
30           motility by substrates either for glycolysis or for respiration. By contrast, inhibition of glycolysis by  
31           alpha-chlorohydrine (ACH) caused significant decrease in bend angle of flagellar bending wave,  
32           sliding velocity of outer doublet microtubules and ATP content even in the presence of respiratory  
33           substrates (pyruvate or beta-hydroxybutyrate; BHB). The decrease of flagellar bend angle and  
34           sliding velocity are prominent in the distal part of the flagellum, indicating that glycolysis  
35           inhibition caused the decrease in ATP concentration therein. These results suggest that glycolysis  
36           potentially act as a spatial ATP buffering system, transferring energy (ATP) synthesized by  
37           respiration at mitochondria located in the basal part of the flagellum to the distal part. In order to  
38           validate glycolytic enzymes can transfer high energy phosphoryls, we calculated intraflagellar  
39           concentration profiles of adenine nucleotides along the flagellum by computer simulation analysis.  
40           The result demonstrated the involvement of glycolysis for maintaining the ATP concentration at the  
41           tip of the flagellum. It is likely that glycolysis plays a key role in energy homeostasis in mouse  
42           sperm not only through ATP production but also through energy transfer.

43

## 44 Introduction

45 Mammalian sperm flagella require motility for a long period of time from ejaculation to  
46 accomplish fertilization (Austin, 1985). For the maintenance of motility during such a long  
47 period, mammalian sperm must continue to metabolize extracellular energy substrates for  
48 producing ATP. Therefore, elucidation of the correlation between flagellar movement and  
49 energy metabolism is very important to understand the functional feature of the mammalian  
50 sperm. Furthermore, it has been expected to be applied to the treatment of male infertility and  
51 contraceptive technologies.

52 There are two major metabolic pathways to produce ATP, glycolysis and respiration. Most  
53 mammalian sperm must produce ATP to keep vigorous motility by both or one of them, which  
54 are localized at different region of sperm. Mitochondria which perform respiration are  
55 localized in the mid-piece, the basal limited locus of flagellum. On the other hand, glycolysis  
56 works in the principal piece of flagella occupying major part of flagellum, since several  
57 glycolytic enzymes have been reported to be localized on the fibrous sheath, a cytoskeletal  
58 structure which goes through entire length of the sperm tail (Krisfalusi et al., 2006; Westhoff  
59 and Kamp, 1997). Because of higher efficiency of ATP production and an abundance of  
60 mitochondria in mammalian sperm, respiration has been considered to be a major source of  
61 ATP production.

62 Recent studies, however, demonstrated that glycolysis plays a major role for ATP  
63 production in mouse sperm flagellar movement (Mukai and Okuno, 2004).  
64 Glyceraldehyde-3-phosphate dehydrogenase (GAPDH), one of glycolytic enzyme that  
65 catalyzes glyceraldehyde-3-phosphate (GAP) to 1, 3-bisphosphoglycerate (1, 3BPG), is

66 abundantly localized to the fibrous sheath in porcine, human, bovine, equine and murine sperm  
67 (Westhoff and Kamp, 1997; Welch et al., 2000). Genetic deletion of sperm specific isoenzyme  
68 of GAPDH, GAPDS, using knock-out model gave rise to sperm immotility even in the  
69 presence of pyruvate, a respiration substrates, resulting in infertility (Miki et al., 2004). In  
70 addition to GAPDS, proteomic studies revealed that multiple glycolytic enzymes (hexokinase,  
71 aldolase, phosphoglycerate kinase, enolase, pyruvate kinase and lactate dehydrogenase) were  
72 demonstrated to localize in the fibrous sheath in mouse sperm (Krisfalusi et al., 2006). It was  
73 also reported that the knock-out mouse of sperm specific glycolytic enzymes, lactate  
74 dehydrogenase C (LDHC) and phosphoglycerate kinase 2 (PGK2), resulted in infertility in  
75 mouse (Odet et al., 2008; Danshina et al., 2010). These studies supported that glycolysis in the  
76 principal piece is a crucial ATP production pathway in mouse sperm.

77 Another serious problem that must be solved is how ATP synthesized in mitochondria at  
78 the base of the flagellum is supplied sufficiently to the distal end of the flagellum, because ATP  
79 is necessary at the end of the flagellum for the active bending movement. In sea urchin, the  
80 problem is solved by “creatine shuttle”, an energy transporting system from mitochondria at  
81 the base to the tip of the flagella (Tombes et al., 1987). On the other hand, such an energy  
82 transferring system has not been detected although mouse sperm has a longer flagellum (120  
83  $\mu\text{m}$ ) than sea urchin sperm (40  $\mu\text{m}$ ) (Kamp et al., 1996). These results suggest that  
84 mitochondria-synthesized ATP is not assumed to be supplied to the tip of flagellum sufficiently.  
85 Based on these studies, it has been considered that ATP necessary for flagellar movement is  
86 produced mainly by glycolysis.

87 On the other hand, there are some contradicting reports (Ford, 2006; Tanaka et al., 2004).

88 Tanaka and colleagues (2004) reported that a testis-specific isoenzyme of succinyl CoA  
89 transferase (SCOT-t) is expressed in mouse sperm. SCOT-t is necessary to metabolize  
90 D- $\beta$ -hydroxybutyrate (BHB), a substrate of respiration. When BHB was supplemented to the  
91 sperm suspension instead of glucose, the percentage of sperm motility was not affected by  
92  $\alpha$ -chlorohydrin (ACH), a potent inhibitor of GAPDH. Moreover, it was reported that  
93 intracellular ATP concentration was not decreased by ACH in the absence of glucose (Ford and  
94 Harrison, 1985; Ford and Harrison, 1986). These results support that respiration is enough to  
95 supply ATP for sperm motility.

96 As mentioned above, there are some contradictory results about the relationship between  
97 metabolic pathways and sperm motility. These studies were focused on which metabolic  
98 pathway (glycolysis or respiration) was important and dominant for sperm motility, and did  
99 not address to the possibilities that these two metabolic pathways may contribute to the  
100 flagellar movement differently. To investigate the possibility, more detailed analysis of  
101 flagellar movement seems to be necessary.

102 In the previous studies, flagellar movement was assessed by the percentage of motile  
103 sperm or the beat frequency of flagellum. However, these parameters were insufficient to  
104 evaluate the “magnitude” of microtubule sliding, an important parameter for evaluating the  
105 amount of microtubule sliding. Flagellar bending motion is produced through sliding of the  
106 pairs of doublet microtubules by forces produced by dynein arms that hydrolyze ATP.  
107 Therefore, microtubule sliding velocity, resulting from the rate of ATP hydrolysis, is directly  
108 related to the ATP concentration which is the result of consumption and production. In order to  
109 assess the contribution of ATP production pathways to the flagellar movement, sliding velocity

110 was calculated as a product of beat frequency and bend angle. It was reported that sliding  
111 velocity correlates with ATP concentration (Yano and Miki, 1980; Si and Okuno, 1995).  
112 Therefore, change of sliding velocity could be assumed to reflect the change of ATP  
113 concentrations directly. Furthermore, the local bending along the flagellum is tightly coupled  
114 to the local sliding velocity since the beat frequency of flagellum is constant throughout the  
115 entire length of flagellum (Okuno and Hiramoto, 1976), and thus leads to an evaluation of  
116 local concentrations of ATP therein.

117 In the present study, correlation between metabolic pathways, especially glycolysis, and  
118 flagellar movement was re-evaluated by detailed motility analysis (measurement of beat  
119 frequency, bend angle, sliding velocity and local bending). Finally, we found that glycolysis  
120 was suggested to function as not only ATP production system, but also energy transferring  
121 system through spatial buffering of ATP.

122

123

124

125

126

127

128

129

130

131

## 132 **Results**

### 133 *Change of motility depending on metabolic substrates*

134 First, differences of motility induced by substrates (Glucose, Pyruvate and BHB) were  
135 evaluated by detailed analysis of flagellar movement using various parameters (beat frequency,  
136 bend angle and sliding velocity of microtubules). Results are summarized in Table 1. Mouse  
137 sperm commonly exhibited high motility (10< Hz beat frequency, 30< rad/sec sliding velocity)  
138 at 10 mmol l<sup>-1</sup> of each substrate, and very little difference of motility parameters (beat  
139 frequency, bend angle, percentage of motility, sliding velocity and waveform of flagella) were  
140 observed among them.

### 141 *Effect of glycolysis inhibition on flagellar movement*

142 Sperm maintained vigorous motility for more than 60 min either in the presence of  
143 Glucose, pyruvate or BHB (Table 1). This result indicates that mouse sperm can produce  
144 sufficient ATP to sustain motility by either glycolysis or respiration alone. Then, we observed  
145 the effect of glycolysis inhibition on sperm motility to clarify the contribution of glycolysis on  
146 sperm motility. Fig. 1 shows change of beat frequency, bend angle and sliding velocity with  
147 time in the presence or absence of  $\alpha$ -chlorohydrin (ACH). When glycolysis was inhibited by  
148 ACH in the presence of glucose, mouse sperm stopped swimming by 60 minutes (Fig. 1). On  
149 the other hand, beat frequency of sperm was not affected by ACH at least for 60 min, when  
150 substrate for respiration, BHB or pyruvate, was added to the test solution (Fig. 1A) instead of  
151 glucose. However, the bend angle of flagella was significantly inhibited by ACH at 30 and 60  
152 minutes after activation even in the presence of BHB or pyruvate (Fig. 1B). As a result, sliding  
153 velocity was significantly reduced by ACH to less than 30 rad/sec at 30 and 60 minutes after

154 activation (Fig. 1C). Similar results were obtained when glycolysis was inhibited by  
155 2-deoxyglucose (DOG), an analog of glucose that inhibits hexokinase (Hiipakka and  
156 Hammerstedt, 1978; Hyne and Edwards, 1985: Data not shown). Because sliding velocity was  
157 known to correlate with ATP concentration (Yano and Miki, 1980; Si and Okuno, 1995), these  
158 results indicated a decrease in intracellular ATP by ACH even in the presence of respiratory  
159 substrates.

#### 160 *Effect of glycolysis inhibition on local bending of flagellum*

161 Glycolysis-inhibited sperm showed unchanged beat frequency and significantly reduced  
162 bend angle in the presence of respiratory substrates. To further characterize the decrease of  
163 bend angle, local bending along the flagellum was investigated in every 10  $\mu\text{m}$  by measuring  
164 the shear angle.

165 In the presence of respiratory substrates and absence of ACH, local shear angle in the  
166 flagellum increased as the bending wave propagated to the distal end, except for a “singular  
167 point” at 70  $\mu\text{m}$ , where tangent line and reference line synchronously keep rather parallel  
168 (BHB or pyruvate; Fig. 2A, B). On the other hand, sperm whose glycolysis was inhibited by  
169 ACH did not show such an increase along the flagellar axis in the shear angle. The shear angle  
170 of flagellum was almost unchanged from the basal region to the distal end of flagellum (Fig.  
171 2A, B). Similar results were obtained with DOG. These results indicate that inhibition of  
172 glycolysis abolished the increase in the shear angle toward the distal end of flagellum.

173 Data shown in Figure 2A, B were re-plotted as the ratio of local bending by dividing  
174 shear angle in glycolysis-inhibited sperm by that in the control sperm (Fig. 2C, D). The ratio of  
175 local bending of glycolysis-inhibited sperm was high at the basal region of flagellum (about



176 0.7), suggesting that the inhibition was low, but was considerably reduced at the tip of  
177 flagellum (about 0.5).

178 In addition to the evaluation of local bending by the shear angle, local bending was  
179 evaluated by the bend angle in order to eliminate the “singular point” observed in Fig. 2A and  
180 B (Fig. 3). Similar to the result of shear angle (Fig. 2A, B), sperm showed gradual increase in  
181 bending as wave propagated when glycolysis was not inhibited by ACH (filled symbols). By  
182 contrast, glycolysis-inhibited sperm (open symbols) did not show so large increase as those  
183 without ACH, consistent with the results of the shear angles (Fig. 2A and B). These results  
184 indicate that reduction of bending is prominent in the distal region of flagellum.

#### 185 *Effect of glycolysis inhibition on the content of ANP in sperm*

186 Glycolysis-inhibited sperm showed decreased bend angles and sliding velocities despite  
187 the presence of respiratory substrates, suggesting a decrease in ATP concentration. In order to  
188 examine whether intracellular ATP was decreased or not, ANP content was directly measured  
189 by reversed-phase high performance liquid chromatography (HPLC) in mouse sperm 30  
190 minutes after activation. Fig. 4 shows the change in the ANP content by the inhibition of  
191 glycolysis.

192 When glucose was added to the media as a metabolic substrate, a higher content of ATP  
193 (about 0.4 nmol/10<sup>6</sup> sperm), and lower contents of ADP and AMP (approximately 0.16 and  
194 0.07 nmol/10<sup>6</sup> sperm, respectively) were measured than in sperm incubated in the absence of  
195 substrates. Similarly, high contents of ATP and low contents of ADP, AMP were observed in  
196 the presence of respiratory substrates (Pyr and BHB). There was no significant difference  
197 between them. ACH treatment, however, caused a drastic decrease in ATP ( $p < 0.01$ ) content

198 and increase in AMP content ( $p < 0.01$ ) in the presence of glucose. ACH treatment also caused a  
199 decrease in ATP content and increase in ADP and AMP in the presence of pyruvate and BHB.  
200 These results suggest that inhibition of glycolysis by ACH causes metabolic perturbation even  
201 in the presence of respiratory substrates.

### 202 *Metabolome analysis*

203 In order to determine the intracellular state of metabolic intermediates, metabolomic  
204 analysis by CE-TOFMS was conducted (table 2). Intracellular ATP content determined by  
205 metabolomic analysis was  $0.368 \text{ nmol}/10^6$  sperm. This value was approximately the same as  
206 that determined by HPLC (Fig. 4), indicating the accuracy of metabolomic analysis.  
207 Calculated concentrations of total intracellular ANP and total PGK substrates (total 3PG and 1,  
208 3BPG) were  $11.6 \text{ mmol l}^{-1}$  and  $0.155 \text{ mmol l}^{-1}$ , respectively (table 2). The values for the  
209 cytosolic volume used to calculate the intracellular concentration of each parameter was 53.5  
210 fL (Yeung et al., 2002). The values used for following computer simulation were shown in  
211 Table 2.

### 212 *Computer simulation*

213 As described above, glycolysis inhibition caused the decrease in the sliding velocity at  
214 the distal part of the flagellum, indicating the deficiency of ATP therein in spite of the presence  
215 of respiratory substrates. These results suggest that ATP synthesized by mitochondria at the  
216 base (mid piece) could not supply to the distal part of the flagellum sufficiently when  
217 glycolysis is inhibited. This phenomenon raised the possibility that glycolysis functions as a  
218 spatial buffering of ATP along mouse sperm flagellum, transferring “energy wave” from the  
219 mid piece to the distal end.

220 In previous studies, it was reported that glycolytic enzymes, particularly  
221 phosphoglycerate kinase (PGK), have a potential to transfer energy in muscle cells through  
222 buffering of ATP (Dzeja et al., 2004; Dzeja and Terzic, 2003). To assess the possibility that  
223 glycolysis has the potential to transport energy to the distal end of the flagellum in mouse  
224 sperm, the concentrations of high energy phosphoryls (ATP and ADP) along the flagellum  
225 were calculated by simulating the intraflagellar diffusion of high energy phosphoryls *in silico*.  
226 The algorithms of the simulation were based on the simulation model by Tombes et al. that  
227 verified energy transfer potential of creatine kinase in sea urchin sperm (Tombes et al., 1987).  
228 The diffusing length of flagellum was set to 100  $\mu\text{m}$  although murine sperm has a 120  $\mu\text{m}$   
229 flagellum, because the mid piece, a mitochondria-rich region, is as long as 20  $\mu\text{m}$ . Fig. 5.  
230 illustrates the results of calculations of ATP, ADP and ATPase activity profile along the  
231 flagellum.

232 It was reported that adenylate kinase (AK) also participates in energy transfer (Dzeja and  
233 Terzic, 2003). Since AK is abundantly present throughout the mouse sperm flagella (Cao et al.,  
234 2006), the reaction of AK was also considered in the equation. The parameters of AK used in  
235 the simulation were obtained from the data on rabbit muscle AK (Noda, 1973). When the  
236 reaction by AK is included and glycolysis (PGK) is excluded in the simulation, ATP at the tip  
237 of the flagellum decreased from 11.4  $\text{mmol l}^{-1}$  (basal concentration) to 5.45  $\text{mmol l}^{-1}$ , whereas  
238 ADP at the tip increased from 0.2  $\text{mmol l}^{-1}$  (basal concentration) to 3.71  $\text{mmol l}^{-1}$  (data not  
239 shown). The ratio of the total amount of intraflagellar ATP to the total ADP calculated by  
240 computer simulation was approximately 5:2 under this condition where only AK operates in  
241 ATP transfer. This ratio was quite different from the ratio of the total intracellular ATP to total

242 intracellular ADP of glycolysis-inhibited sperm determined by HPLC analysis, which was  
243 approximately 5:4 (Fig. 4). When both AK rate and PGK rate were reduced to zero, in other  
244 words, when ATP at the distal region was assumed to be supplied only by simple diffusion  
245 from the mid piece without ATP buffering, the ratio of the total intraflagellar ATP to the total  
246 intraflagellar ADP was calculated to be approximately 5:4, similar to the ratio determined by  
247 HPLC in glycolysis-inhibited sperm (Fig. 5, red lines). These results suggest that AK activity  
248 may be so low that we can neglect its involvement in the energy transferring system in mouse  
249 sperm under physiological conditions despite the presence of AK (Cao et al., 2006). Therefore,  
250 in following calculations ANP profiles along the flagellum were done without AK activity (Fig.  
251 5A-C).

252 When PGK activity was reduced to zero, drastic decrease was observed in ATP  
253 concentration from  $11.4 \text{ mmol l}^{-1}$  (basal concentration) to  $4.32 \text{ mmol l}^{-1}$  and increase in ADP  
254 concentration from  $0.2 \text{ mmol l}^{-1}$  (basal concentration) to  $7.13 \text{ mmol l}^{-1}$  at the tip of flagellum  
255 were observed. The resultant activity of dynein ATPase at the tip of the flagellum attenuated  
256 from  $0.133 \text{ mmol l}^{-1}/\text{sec}$  (basal value, this value is constant among calculations) to  $0.0738$   
257  $\text{mmol l}^{-1}/\text{sec}$ . The ATPase activity was calculated from the equation (2) in Materials and  
258 Methods. This means that ATPase rate at the tip of the flagellum decreased to approximately  
259 55% of the basal value.

260 When PGK reaction was included in the equation, a slight increase in ATP concentration  
261 from  $4.32 \text{ mmol l}^{-1}$  to  $4.5 \text{ mmol l}^{-1}$  and a decrease in ADP concentration from  $7.13 \text{ mmol l}^{-1}$  to  
262  $7.0 \text{ mmol l}^{-1}$  were observed in the presence of  $0.155 \text{ mmol l}^{-1}$  PGK substrates (total 3PG and 1,  
263 3BPG). The resultant ATPase activity at the tip was  $0.0754 \text{ mmol l}^{-1}/\text{sec}$ , which is almost the

264 same to that calculated without the PGK activity. However, the ATPase activity at the tip of the  
265 flagellum increased up to 0.0895 mmol l<sup>-1</sup>/sec, 0.104 mmol l<sup>-1</sup>/sec and 0.131 mmol l<sup>-1</sup>/sec  
266 when the concentration of the PGK substrates increased to 1.55 mmol l<sup>-1</sup>, 3.1 mmol l<sup>-1</sup> and 6.2  
267 mmol l<sup>-1</sup>, respectively (Fig. 5C). These results indicate that PGK has a capacity to transfer high  
268 energy phosphoryls through spatial buffering of ATP when sufficient glycolytic intermediates  
269 are available.

270

271

272

273

274

275

276

277

278

## 279 Discussion

280 Mammalian sperm must metabolize extracellular energy substrates to produce ATP for a  
281 long period to accomplish fertilization. Recently, many investigators reported about the  
282 relationship between metabolic pathway and flagellar motility in mouse sperm (Mukai and  
283 Okuno, 2004; Miki et al., 2004; Ford, 2006; Tanaka et al., 2003), but none of them focused on  
284 the different contribution of metabolic pathways to the flagellar movement. In the present  
285 study, we performed detailed analysis of mouse sperm flagellar movement using various

286 parameters to estimate the difference of contribution of metabolic pathways to mouse sperm  
287 motility, and revealed that glycolysis has an important role in energy transfer in mouse sperm  
288 flagella.

289 As reported previously (Mukai and Okuno, 2004; Miki et al., 2004; Tanaka et al., 2003),  
290 mouse sperm maintained vigorous motility for more than 60 min in the presence of energy  
291 substrates (glucose, pyruvate, BHB). There was no difference in motility parameters (beat  
292 frequency, bend angle, percentage of motility and sliding velocity) by substrates (Table 1).  
293 Since glucose is metabolized by glycolysis alone when sufficient glucose is available (Odet et  
294 al., 2011), these results indicate that mouse sperm are able to produce and supply sufficient  
295 amount of ATP for maintaining motility by both glycolysis and respiration.

296 On the other hand, ACH, which inhibits GAPDH through oxidation in cytoplasm (Mohri  
297 et al., 1975; Brown-Woodman et al., 1978; Stevenson and Jones, 1985), caused significant  
298 decrease in the bend angle and the sliding velocity even in the presence of respiratory  
299 substrates such as pyruvate or BHB (Fig. 1). Furthermore, measurements of local bending  
300 revealed flagellar bending was severely inhibited by ACH and DOG especially at the distal  
301 region of flagellum (Figs 2, 3). These results are inconsistent with the previous study (Tanaka  
302 et al., 2004). Detailed analysis of flagellar movement of the present study allowed us to  
303 evaluate motility change which had been overlooked in the assessments of the percentage of  
304 motile sperm in the previous study.

305 If the beat frequency is assumed to be constant throughout the flagellum as Okuno and  
306 Hiramoto (1976) suggested, a decrease in local bending at a distal part of flagellum indicates a  
307 decrease in sliding velocity of doublet microtubule at that locus. Since the sliding velocity

308 correlates ATP concentration, the decreased bending suggests the decrease in ATP  
309 concentration at the distal part of the flagellum in glycolysis-inhibited sperm. By contrast, it is  
310 likely that ATP level at basal region of glycolysis-inhibited sperm is unchanged or almost  
311 saturated since beat frequency and local bending of basal region was unaffected by ACH. This  
312 motility character resembles in sea urchin sperm flagella in which the activity of creatine  
313 kinase is inhibited. In this case, creatine phosphate and creatine kinase are indispensable for  
314 energy supply from mitochondria located at basal region of flagellum to the distal end  
315 (Tombes et al., 1987; Tombes and Shapiro, 1985). Moreover, Shingyoji and colleagues (1995)  
316 reported about the relationship among the ATP concentration, beat frequency, bend angle and  
317 sliding velocity using a head vibrating technique of demembrated sea urchin sperm as  
318 follows; the head of demembrated sea urchin sperm suspended in a certain concentration of  
319 ATP were held by suction at the tip of a micropipette and vibrated laterally with respect to  
320 head axis. When sperm was vibrated at frequencies higher than undriven beat frequency of  
321 flagella, the apparent time-averaged sliding velocity of axonemal microtubules remain  
322 constant, with higher frequency being accompanied by decrease in the bend angle (Shingyoji  
323 et al., 1995). This phenomenon corresponds with the present study; proximal region of flagella  
324 is assumed to contain high concentration of ATP in the presence of respiratory substrates  
325 because mitochondria are located at the proximal region of flagella (mid piece), resulting in  
326 high sliding velocity therein. Generated bends propagate with a constant beat frequency to the  
327 distal end of flagellum. However, decrease in ATP concentration at the distal end of flagellum  
328 by glycolysis inhibition causes decrease in sliding velocity at distal end, as a consequence of  
329 the decrease in bend angle. Taken together, glycolysis inhibition by ACH (or DOG) probably

330 induced a decrease in ATP, especially at the distal part of flagellum even in the presence of  
331 respiratory substrates.

332 On the other hand, sperm swimming in the media supplied with respiration substrates  
333 without glycolysis inhibition showed local bending and sliding velocity comparable to those  
334 observed in sperm supplied with glucose throughout the flagellum. This result suggests  
335 sufficient ATP was supplied to the distal end of flagellum. Taken together, it is likely that  
336 glycolysis has an important role for the supply of ATP to the distal end of flagellum.

337 Since the decrease in ATP concentration at distal part of flagellum is assumed to result in  
338 the decrease in total ATP in the sperm, total ATP in sperm was measured directly by  
339 reversed-phase HPLC. As shown in Fig. 4, the total ATP content was apparently reduced by  
340 ACH in pyruvate- and BHB-supplied sperm. By contrast, the ADP and AMP content increased  
341 by ACH treatment. Because several  $\text{mmol l}^{-1}$  of ADP inhibits dynein ATPase in a competitive  
342 manner (Okuno and Brokaw, 1979), the increase in ADP, together with the decrease in ATP  
343 concentration, may impair microtubule sliding velocity. Therefore, it is likely that the  
344 reduction in sliding velocity by inhibition of glycolysis may be induced by both decrease in  
345 ATP and increase in ADP.

346 It was previously proposed that ATP produced in mitochondria at the base of flagellum is  
347 supplied to the distal part of flagellum by simple diffusion (Nevo and Rikmenspoel, 1970).  
348 Tombes and colleagues, however, reported that sea urchin sperm could not maintain normal  
349 motility and failed in accomplishing fertilization without creatine kinase, an enzyme which  
350 catalyzes the reaction that is indispensable for energy-transporting system (Tombes and  
351 Shapiro, 1985; Tombes et al., 1987). Since mouse sperm have three times longer flagella (120



352  $\mu\text{m}$ ) than sea urchin sperm ( $40 \mu\text{m}$ ), it is predicted that ATP produced in mitochondria at the  
353 basal region of flagellum cannot be supplied sufficiently by simple diffusion. Nevertheless,  
354 creatine kinase was not detected in mouse sperm (Kamp et al., 1996). Furthermore, knock out  
355 of ubiquitous mitochondrial creatine kinase in mouse did not impact on sperm motility and  
356 fertility (Steeghs et al., 1995). As mouse sperm apparently can supply adequate ATP from base  
357 to the tip of the flagellum (Figs 2, 3), another energy supplying system in mouse sperm is  
358 predicted.

359 In skeletal muscle, an energy transferring system by glycolytic enzymes through ATP  
360 spatial buffering which is called near equilibrium enzymatic flux network, was proposed  
361 recently (Dzeja et al., 2004; Dzeja and Terzic, 2003). In this system, individual glycolytic  
362 enzymes work as an ATP spatial buffer, replenishing ATP at the distal part of the flagellum.  
363 Sequential buffering reactions by glycolytic enzymes apparently “transfer” a wave of high  
364 energy phosphoryls from basal mitochondria to the distal part of the flagellum. Based on their  
365 theory, we would like to propose a hypothesis about a new function of glycolysis as energy  
366 transferring system in mouse sperm flagella. Schematic model of energy transfer by glycolytic  
367 enzymes is illustrated in Fig. 6. In this model, sequential rapid equilibrating reactions  
368 catalyzed by phosphoglycerate kinase (PGK) and GAPDH work in concert as a spatial ATP  
369 buffer, which transfer “energy wave” from the ATP producing site (mitochondria at mid-piece)  
370 to ATP consuming sites (dynein arms along the flagellum) in the flagellum. To realize this ATP  
371 spatial buffer, it is essential that enzymes involved in the reaction distribute throughout the  
372 flagellum. From this point of view, glycolytic enzymes are suitable for supplying ATP since  
373 glycolytic enzymes localize to the fibrous sheath as a complex, which runs along the entire

374 length of the sperm tail. In addition, it is assumed that reduction in the flagellar bending at the  
375 distal part of the flagellum caused by ACH is attributed to the accumulation of Pi, a product of  
376 ATP hydrolysis, because Pi acts as a competitive inhibitor as demonstrated in demembraneated  
377 sea urchin sperm motility although the inhibition is not so strong (Okuno and Brokaw, 1979).

378 To validate the hypothesis that glycolytic enzyme functions as an ATP spatial buffer,  
379 computer simulation of ANP diffusion along the flagellum was conducted based on the  
380 algorithms by Tombes et al. (1987). In this simulation, we adopted the reaction by PGK only  
381 since reaction of PGK is reported to be particularly important for transfer high energy  
382 phosphoryls (Dzeja and Terzic, 2003). Although AK is abundantly present throughout the  
383 mouse sperm flagella (Cao et al., 2006), we ignore the reaction of AK because of the reasons  
384 described in Results.

385 The ATPase activity at the distal end attenuated from  $0.133 \text{ mmol l}^{-1}/\text{sec}$  (basal value) to  
386  $0.0738 \text{ mmol l}^{-1}/\text{sec}$  in the absence of PGK reaction. Inclusion of the PGK activity did not  
387 significantly cause the recovery of ATPase activity at the tip of the flagellum ( $0.0754 \text{ mmol}$   
388  $\text{l}^{-1}/\text{sec}$ ) when the concentration of PGK substrates (total 3PG and 1, 3BPG) were  $0.155 \text{ mmol}$   
389  $\text{l}^{-1}$ , a value determined by metabolomic analysis (Table 2). Increase in the concentration of  
390 PGK substrates ( $\sim 3.1 \text{ mmol l}^{-1}$ ), however, caused a recovery of ATPase activity to  $0.104 \text{ mmol}$   
391  $\text{l}^{-1}/\text{sec}$ . Finally, ATPase activity at the tip did not decrease in the presence of PGK substrates as  
392 high as  $6.2 \text{ mmol l}^{-1}$  ( $0.131 \text{ mmol l}^{-1}/\text{sec}$ , Fig. 5). These results suggest that a PGK reaction  
393 potentially acts as ATP spatial buffer, transferring energy in mouse sperm flagella when  
394 sufficient PGK substrates are available. In *Lactococcus lactis*, more than  $10 \text{ mmol l}^{-1}$  of 3PG  
395 was observed by  $^{13}\text{C}$ -NMR analysis (Neves et al., 2000). In addition, 3PG and 1, 3BPG

396 concentrations in mouse brain cells were calculated to be 18.4 and 20.8  $\text{mmol l}^{-1}$ , respectively,  
397 by computer simulation analysis (Olán et al., 2008). By contrast to these reports, PGK  
398 substrates concentration determined by metabolomic analysis in the present experiment was  
399 much lower, 0.155  $\text{mmol l}^{-1}$  (Table 2). Since 3PG and 1, 3BPG are highly unstable compounds,  
400 it could be speculated that they have been degraded during sample preparation in the present  
401 experiment, resulting in underestimation of the concentration of PGK substrates. The actual  
402 concentrations of PGK substrates could be enough for energy transfer in mouse sperm.

403 The calculated ratio of the total intraflagellar ATP to the total ADP in the presence of 1.55  
404  $\text{mmol l}^{-1}$  PGK substrates was 5:2. The ratio of total intracellular ATP to total ADP in  
405 glycolysis-non-inhibited sperm determined by HPLC measurements in the present experiments  
406 represented 5:2-6:2 (Fig. 4). This ratio, 5:2, is obtained by simulation when PGK concentration  
407 is 1.55  $\text{mmol l}^{-1}$ . Therefore, the experimental data seems to support that actual value of  
408 intracellular PGK substrates are approximately 1.55  $\text{mmol l}^{-1}$ .

409 On the other hand, fitting of the results of computer simulation to the results of flagellar  
410 movement analysis suggested a different concentration of PGK substrates. The ATPase activity  
411 at the tip of the flagellum calculated from the PGK activity in the presence of 6.2  $\text{mmol l}^{-1}$   
412 PGK substrates was 0.131  $\text{mmol l}^{-1}/\text{sec}$ . By contrast, The ATPase activity at the tip of the  
413 flagellum without PGK activity was 0.0738  $\text{mmol l}^{-1}/\text{sec}$ ; the ratio between two ATPase values  
414 was 0.56. This ratio was similar to the ratio of local bending of glycolysis-inhibited sperm to  
415 that of control sperm at the tip of the flagellum, which was approximately 0.5 (see Figs 2, 3).  
416 Changes in local bending along the flagellum in the presence of ACH obtained in the present  
417 experiments (Fig. 2C and D) and the simulated ATPase activity (Fig. 5C) are superimposed in

418 Fig. 7. The relatively good coincidence of them suggests that the energy transporting system  
419 by means of glycolysis could be employed in the flagellum. These results suggest that realistic  
420 intracellular concentration of PGK substrates is approximately  $6.2 \text{ mmol l}^{-1}$ . Taken together,  
421 the concentration of PGK substrates were assumed to be  $1.5\text{-}6.2 \text{ mmol l}^{-1}$ . Under present  
422 experimental conditions, such concentrations of PGK substrates might realized by high  
423 concentrations of respiratory substrates which would stop glycolytic flux, or alternatively high  
424 concentrations of respiratory substrates would replenish PGK substrates by reverse reaction  
425 that are conventionally considered irreversible under physiological condition. Although the  
426 results from computer simulation analysis strongly suggest that PGK has a potential to  
427 functions as ATP spatial buffer, transferring energy in mouse sperm flagella, further studies to  
428 determine the accurate value of PGK substrates concentration are necessary.

429 In conclusion, it was suggested that the ATP content in distal part of flagellum is reduced  
430 by glycolysis inhibition even in the presence of substrates of respiration. Based on this result,  
431 we proposed a new energy transfer system based on spatial buffering of ATP by glycolytic  
432 enzymes in mouse sperm. Further investigations about this new function of glycolysis in  
433 mouse sperm are needed, and would shed a light on energy homeostasis not only in  
434 mammalian sperm physiology, but also in diverse motile cilia and flagella.

435

436

437

438

439

## 440 **Materials and Methods**

### 441 *Sperm preparation*

442 Sperm were obtained from the cauda epididymis of 8-15 wk old ICR male mice (*Mus*  
443 *Musculus*) in accordance with the guidance of the University of Tokyo. The cauda epididymis  
444 was excised and punched with needles. Epididymal sperm was gently squeezed out and diluted  
445 into 100  $\mu$ l of sucrose solution (300 mmol l<sup>-1</sup> sucrose, 10 mmol l<sup>-1</sup> HEPES-NaOH, pH 7.4), in  
446 which sperm exhibited very low activity (about 1 Hz of beat frequency), referred to as the  
447 initiated sperm by Fujinoki et al (2001). The sperm suspension was diluted with the test  
448 solution for the following experiments. The test solution contains 150 mmol l<sup>-1</sup> NaCl, 5.5  
449 mmol l<sup>-1</sup> KCl, 0.4 mmol l<sup>-1</sup> MgSO<sub>4</sub>, 1 mmol l<sup>-1</sup> CaCl<sub>2</sub>, 10 mmol l<sup>-1</sup> NaHCO<sub>3</sub>, 10 mmol l<sup>-1</sup>  
450 HEPES-NaOH (pH 7.4), and 10 mmol l<sup>-1</sup> of metabolic substrates, such as glucose (Glc),  
451 pyruvate (Pyr), and BHB. One volume of sperm suspension was diluted into 20 volume of  
452 each test solution and was incubated in CO<sub>2</sub> incubator (37°C, 5% CO<sub>2</sub>) for observation.

453 For the inhibition of glycolysis, either 10 mmol l<sup>-1</sup> of ACH or 10 mmol l<sup>-1</sup> of DOG was  
454 added to each test solution.

### 455 *Analysis of sperm motility*

456 After the incubation in the test solution containing metabolic substrates and inhibitors, an  
457 aliquot of sperm suspension was placed onto a prewarmed glass slide at 37°C and covered  
458 with a coverslip for observation with a microscope.

459 For the analysis of microtubule sliding velocity, sperm with their head attach to the glass  
460 surface was observed using a phase-contrast microscope (Diaphoto, Nikon, Tokyo, Japan),  
461 captured by a CCD camera (CR-20, Video Device, Chiba, Japan) and recorded by a video

462 recorder (HR-G11, Victor · JVC, Kanagawa, Japan). To analyze the sliding velocity, the  
463 flagellar waveforms were carefully traced by hand from a video monitor onto a transparent  
464 plastic film. The beat frequency was calculated from the number of video fields required to  
465 complete one beat cycle determined by using the traced waveform. The bend angle of a  
466 flagellum was determined by measuring the angle between the tangents at two adjacent point  
467 of inflection when flagellar bends reach at the center of flagellum (Fig. 8A). Bend angle was  
468 measured for both principal bends (Fig. 8A-a) and reverse bends (Fig. 8A-b), and data were  
469 expressed as a sum of both values. Microtubule sliding velocity was defined as the  
470 multiplication of beat frequency and bend angle.

471 For the measurement of the shear angle, sperm with their head attached to the glass  
472 surface was recorded digitally using a phase-contrast microscope and a computer-driven  
473 high-speed camera (HAS-220CH, DITECT, Tokyo, Japan). The shear angle of sperm flagella  
474 was analyzed by “Bohboh”, a flagellar movement auto-analyzing software kindly provided by  
475 Dr. Shoji Baba (emeritus professor at Ochanomizu University, Tokyo, Japan). Shear angle was  
476 defined as the angle between the reference line at the base of the flagellum, usually parallel to  
477 the head axis, and the tangent at a point along the flagellum (See Fig. 8B). In the present  
478 experiment, shear angle was determined every 10  $\mu\text{m}$  on the flagellum from the base to the tip  
479 for 3 cycle of beating. Then, difference between the maximum and minimum values was  
480 defined as a local amount of microtubule sliding per one beat cycle (Fig. 8B).

481 A local bend angle, defined as the angle between the tangents at the two inflection points  
482 around each vertex of the waveform, was determined on the images captured digitally by  
483 high-speed camera. The analysis was conducted manually as the determination of bend angle.

484 The distance of bending vertex from the base of flagellum was determined digitally by Bohboh  
485 software.

#### 486 *Measurement of ATP content by reversed phase HPLC*

487 Evaluation of ATP content in mouse sperm cells was performed by reversed-phase HPLC  
488 (LC10VP series, Shimadzu, Kyoto, Japan) with slight modifications (Mukai and Okuno, 2004;  
489 Samizo et al., 2001). Sperm suspended with each test solution in microtubes were incubated in  
490 a CO<sub>2</sub> incubator (5% CO<sub>2</sub>, 37°C) for 30 min. One-tenth volume of 3% ice chilled perchloric  
491 acid (PCA) was added to each sperm suspension to remove proteins, and the microtubes were  
492 placed on ice for 10 min. After centrifugation (10000 x g, 10 min, 4°C), the supernatant was  
493 filtered with a membrane of 0.22 µm pore size. Filtered solution was neutralized with  
494 phosphate buffer, and 25 µl of neutralized solution was applied to a reversed-phase HPLC  
495 column (Phenomenex Luna 5 µC18, 4.6 × 150 mm; Shimadzu GLC, Tokyo, Japan). The  
496 mobile phase contained 20 mmol l<sup>-1</sup> potassium phosphate (pH 6.8), and 5 mmol l<sup>-1</sup> of  
497 tetrabutyl-ammonium hydroxide, and 20% methanol. The number of sperm cells was counted  
498 in each sample, and the content of ATP was represented as nmol per 10<sup>6</sup> sperm.

#### 499 *Metabolomic analysis*

500 To determine the content of glycolytic intermediates, metabolome analysis was performed  
501 by a capillary electrophoresis electrospray ionization time-of-flight mass spectrometry  
502 (CE-TOFMS) method. One ml of sperm suspension in sucrose solution was diluted into  
503 10-fold volumes of each test solution containing 1 mmol l<sup>-1</sup> glucose or 10 mmol l<sup>-1</sup> pyruvate  
504 with or without 10 mmol l<sup>-1</sup> ACH, and incubated for 30 minutes at 37°C. After incubation,  
505 75% percoll was added to the bottom of the tube and centrifuged for 5 minutes at 900 x g, 4°C.

506 Sperm were observed in the layer between the test solution and percoll. Then the supernatant  
 507 test solution was discarded and the resultant was washed with 5% (w/w) mannitol solution to  
 508 remove electrolytes. After centrifugation ( $900 \times g$ ,  $4^\circ\text{C}$ , 2.5 minutes), supernatant was  
 509 discarded and 1 ml of ice-cold methanol was added to fix sperm. Methanol-fixed sperm  
 510 samples were separated by capillary electrophoresis and the amount of each intermediates are  
 511 quantified by Mass spectrometry. CE-TOFMS analysis was performed by Human Metabolome  
 512 Technologies Inc.(Yamagata, Japan).

513 ***Computer simulation analysis of diffusion of ATP and high energy phosphoryls***

514 Calculation of high energy phosphoryls diffusion along the flagellum is performed based  
 515 on the algorithms previously reported by Tombes et al (1987). In the model, each molecular  
 516 species diffusing along the flagellum is governed by a diffusion equation,

517 
$$\frac{\partial C_{(s,t)}}{\partial t} = D \cdot \frac{\partial^2 C_{(s,t)}}{\partial s^2} + Q_{(s,t)} \dots\dots\dots(1)$$

518 where  $C_{(s,t)}$  represents the concentration of the diffusing species at position  $s$  and time  $t$ .  $D$  is  
 519 the relevant diffusion coefficient, and  $Q$  is the rate of production of the species by chemical  
 520 reactions.  $Q$  consisted of three reactions, specified by  $Q_1$ ,  $Q_2$  and  $Q_3$ , are described below.

521  $Q_1$  is the dynein ATPase rate. Since the use of ATP by flagella is tightly coupled to  
 522 motility, the relationship between the ATPase rate and the ATP concentration is assumed to be  
 523 similar to the relationship between flagellar beat frequency and ATP concentration.

524 
$$Q_1 = Q_{IF} / \left( 1 + K1 \left( 1 + \frac{[ADP]}{K_i} / [ATP] \right) \right) \dots\dots\dots(2)$$

525 where  $K1$  is the ATP concentration for half-maximal beat frequency, and  $K_i$  is the  
 526 constant for competitive inhibition of ATPase rate (beat frequency) by ADP. The maximum  
 527 rate,  $Q_{IF}$ , obtained as value of  $0.134 \text{ mmol l}^{-1}/\text{sec}$ , based on measurements of glucose



528 consumption by mouse sperm with the assumption that glucose is metabolized only by  
 529 glycolysis (Odet et al., 2011).  $K_1$  value of  $0.14 \text{ mmol l}^{-1}$ , obtained from the measurements on  
 530 demembrated ram sperm, was kindly provided by Dr. Sumio Ishijima (Tokyo Institute of  
 531 Technology). A value of  $0.28 \text{ mmol l}^{-1}$  was used for  $K_i$ , based on the measurements indicating  
 532 that the value of  $K_i$  for demembrated sea urchin sperm flagella was twice the value of  $K_1$   
 533 (Okuno and Brokaw, 1979). The reverse reaction for the ATPase is neglected.

534  $Q_2$  is the rate for the glycolytic reactions. Because enzyme that catalyze the first step of  
 535 ATP producing reaction (PGK) is reported to be particularly important for transferring high  
 536 energy phosphoryls (Dzeja et al., 2004), only the reaction by PGK is included. This may be a  
 537 good assumption, as glycolytic enzymes exist in a complex manner in spermatozoa (Westhoff  
 538 and Kamp, 1997). The reaction by PGK is as follows:

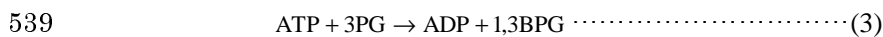

540 where 3PG represents 3-phosphoglycerate and 1, 3BPG represents 1, 3-bisphosphoglycerate.

541 For this reaction, both forward and reverse rates are considered;

542 
$$Q_2 = \frac{\left( Q_{2F} \frac{[3\text{PG}][\text{ATP}]}{K_{mP}K_{mT}} - Q_{2R} \frac{[1,3\text{BPG}][\text{ADP}]}{K_{mB}K_{mD}} \right)}{\left( 1 + \frac{[3\text{PG}][\text{ATP}]}{K_{mP}K_{mT}} + \frac{[1,3\text{BPG}][\text{ADP}]}{K_{mB}K_{mD}} + \frac{[\text{ATP}]}{K_{mT}} + \frac{[3\text{PG}]}{K_{mP}} + \frac{[1,3\text{BPG}]}{K_{mB}} + \frac{[\text{ADP}]}{K_{mD}} \right)}$$

543 
$$\dots\dots\dots(4)$$

544 Values used for the parameters in this equation are given in Table 2.

545  $Q_3$  is the rate for the adenylate kinase (Noda, 1973).

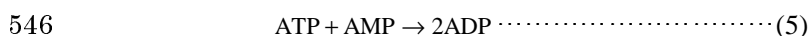

547 For this reaction also, both forward and reverse rates are considered.

548 
$$Q_3 = \frac{\left( Q_{3F} \frac{[ATP][AMP]}{K_N K_M} - Q_{3R} \frac{[ADP][AMP]}{K_A K_A} \right)}{\left( 1 + \frac{[ATP][AMP]}{K_N K_M} + \frac{[ADP][ADP]}{K_A K_A} + \frac{[ATP]}{K_N} + \frac{[AMP]}{K_M} + \frac{2[ADP]}{K_A} \right)}$$

549 .....(6)

550 The parameters used to calculate in this equation ( $Q_{3F}$ ,  $Q_{3R}$ ,  $K_N$ ,  $K_M$ ,  $K_A$ ), which are originated  
551 from rabbit muscle fiber, are given in Table 2.

552 For each species, Q is the sum of the relevant rates as follows: For ATP:  $Q = -Q_1 - Q_2 - Q_3$ ,  
553 for ADP:  $Q = Q_1 + Q_2 + 2Q_3$ , for AMP:  $Q = -Q_3$ , for 3PG:  $Q = -Q_2$ , for 1, 3BPG:  $Q = Q_2$ .

554 If the diffusion coefficients for ATP, ADP, and AMP and those for 3PG and 1, 3BPG are  
555 assumed to be almost equivalent, there will be no gradient of total adenine nucleotide or total  
556 3PG concentration along the flagellum. Thus, AMP can be obtained from (total adenine  
557 nucleotide – ATP – ADP) and 3PG can be obtained from (3PG + 1, 3BPG) – 1, 3BPG.

558 To solve the system of partial differential equations, three equations were integrated  
559 forward with time until a steady equilibrium solution was obtained. Concentrations at the basal  
560 end of the flagellum were held constant, and no fluxes were allowed past the distal end of the  
561 flagellum. Then, for each species, equation (1) was converted to

562 
$$C_{(s,t+\Delta t)} = C_{(s,t)} + D \left[ \frac{(C_{(s-\Delta s,t)} - 2C_{(s,t)} + C_{(s+\Delta s,t)})}{\Delta s^2} \right] \Delta t + Q_{(s,t)} \bullet \Delta t \dots\dots\dots(7)$$

563 The length interval,  $\Delta s$ , was 1  $\mu\text{m}$  in all the results shown, and the time interval,  $\Delta t$ , was  
564 normally 0.5 msec. The simulation program was written and performed by computer  
565 software Mathematica (Wolfram Research, Champaign, IL, USA).

566

567 ***Statistical analysis***

568 Values for sliding velocity, shear angle, and ATP content were expressed as the mean and  
569 standard error of the measure (s. e. m.). Statistical tests were performed using Student's t-test  
570 for testing differences of content of adenine nucleotides. In the other experiments, data were  
571 analyzed by ANOVA and post-hoc Tukey-Kramer test.

### 572 ***Reagents***

573  $\alpha$ -chlorohydrin was purchased from Sigma-Aldrich (St. Louis, U.S.A.),  
574  $\beta$ -hydroxybutyrate was from MP Biomedicals (California, U.S.A.), percoll was from GE  
575 Healthcare (Chalfont St Giles, UK.), and the other chemicals were purchased from Wako Pure  
576 Chemicals Co. Ltd. (Osaka, Japan).

### 577 **Acknowledgements**

578 We are grateful to Dr. Shoji A. Baba of Ochanomizu University for providing flagellar  
579 movement auto-analyzing software "Bohboh". We thank Dr. Sumio Ishijima of Tokyo Institute  
580 of Technology for providing us K1 value of demembrated ram sperm.

581

### 582 **Funding**

583 A part of this research was supported by Sasakawa Scientific Research Grant [22-454] to G.  
584 L. T., and and by Japan Society for the Promotion of Science (JSPS) Grants-in-Aid for  
585 Scientific Research (Wakate B) to C.M. and JSPS Grants-in-Aid for Scientific Research  
586 [17049012] to M.O.

587

### 588 **Abbreviations**

589 ACH:  $\alpha$ - chlorohydrin

590 ADP: adenosine diphosphate

591 AMP: adenosine monophosphate

592 ATP: adenosine triphosphate

593 BHB:  $\beta$ -hydroxy butyrate

594 1, 3-BPG: 1, 3-bisphosphoglycerate

595 DOG: 2-deoxy-D-glucose

596 GAP: glyceraldehyde-3-phosphate

597 GAPDH: glyceraldehyde-3-phosphate dehydrogenase

598 GAPDS: glyceraldehyde-3-phosphate dehydrogenase, spermatogenic

599 Glc: glucose

600 3PG: 3-phosphoglycerate

601 PGK: phosphoglycerate kinase

602 Pi: inorganic phosphate

603

604

605

606

607

608

609

610

611

## Figure legends

612

613 Figure 1: Effect of ACH on sperm flagellar motility in the presence of various substrates.

614

615

616

617

618

619

620

621

622

623

624

Figure 2: Changes of local bending along the glycolysis-inhibited sperm flagella

625

626

627

628

629

630

631

632

633

Sperm was diluted into the media containing substrates only or substrates and inhibitor. Then, change in beat frequency (A), bend angle (B) and shear angle (C) with time-course was plotted. Both the shear angle and the bend angle are represented as the averaged absolute values obtained from both the principal and reverse bend. Beat frequency was not significantly reduced by ACH when pyruvate or BHB was present in the media. By contrast, bend angles and shear angles were significantly reduced by ACH even when pyruvate or BHB was present in the media. Concentrations of substrates and inhibitor were 10 mM. Vertical bars represent SEM. N>9 Asterisks indicate significant difference from control sperm (\*: p<0.05, \*\*: p<0.01). Glc: glucose, Pyr: pyruvate. ACH:  $\alpha$ -chlorohydrin

Sperm were diluted into media containing respiration substrates (A: BHB; B: Pyr) and glycolysis inhibitor (ACH or DOG), then allowed to swim in the media for 1 hour in a CO<sub>2</sub> incubator (37°C, 5% CO<sub>2</sub>, 95% air). After incubation, local shear angle was measured with computer software Bohboh. Changes of shear angle are plotted at indicated distance from the head (A, B). Data shown in (A, B) were expressed as the ratio of the shear angle in control to that in the glycolysis-inhibited sperm (C, D). Bending decreases in the distal part of flagellum. The concentration of each substrate and inhibitor was 10 mM. Bars represent SEM. N=5. Asterisks indicate significant difference from control sperm (\*: p<0.05, \*\*: p<0.01).

634 Figure 3: Scattergram of typical changes of local bend angle with the length of flagella

635 Sperm diluted into media containing respiration substrates and glycolysis inhibitor (ACH), then  
636 allowed to swim in the media for 1 hour in a CO<sub>2</sub> incubator (37°C, 5%CO<sub>2</sub>, 95% air). After  
637 incubation, local bend angle was determined for flagella of sperm attached to the glass surface by  
638 the head. Measurement was performed as described in Materials and methods. Data are shown as  
639 scattergram. ACH-treated sperm (open characters) showed reduced bend angles compared with  
640 non-treated controls (filled characters). The concentrations of each substrate and inhibitor were 10  
641 mM.

642 Glc: glucose, Pyr: pyruvate. ACH:  $\alpha$ -chlorohydrin

643

644 Figure 4: Effect of glycolytic inhibitor on the content of ANP in sperm.

645 Content of ANPs are measured by Reversed-phase HPLC 30 minutes after activation. Decrease  
646 in the ATP content and increase in the ADP and AMP contents by ACH were observed even in the  
647 presence of respiratory substrates. The concentration of each substrate and inhibitor was 10 mM.  
648 Data are means of 15 mice  $\pm$ SEM. Asterisks indicate significant difference from control sperm (\*:  
649  $p < 0.05$ , \*\*:  $p < 0.01$ ).

650 Glc: glucose, Pyr: pyruvate. ACH:  $\alpha$ -chlorohydrin

651

652 Figure 5: Simulation of high energy phosphoryls diffusion along the flagellum.

653 Calculated concentration profiles of ATP (A) and ADP (B), and calculated profiles of ATPase  
654 activity (C) without adenylate kinase activity using the parameters given in Table 2 and equation  
655 indicated by Tombes et al. (1987) are shown.

656

657 Figure 6: Schematic model of energy transfer system by glycolysis

658 Schematic models of energy transporting system in sperm flagella by glycolysis is illustrated  
659 by modifying energy transfer system proposed by Dzeja and Terzic (2003) to sperm flagella.

660 PGK: phosphoglycerate kinase

661 GAPDS: glyceraldehyde-3-phosphate dehydrogenase, spermatogenic

662 GAP: glyceraldehyde-3-phosphate

663 3PG: 3-phosphoglycerate

664 1, 3-BPG: 1, 3-bisphosphoglycerate

665 NAD: nicotinamide adenine dinucleotide (oxidized)

666 NADH: nicotinamide adenine dinucleotide (reduced)

667 Pi: inorganic phosphate

668

669 Figure 7: Superimposed schematic model of energy transporting system without glycolysis to the  
670 flagellar local bending inhibited by ACH

671 Simulated ATPase activity along flagellar axis in the absence of energy transporting system by  
672 glycolysis (Fig. 6C) is superimposed to the relative change in flagellar local bending when  
673 glycolysis is inhibited by ACH. Results from BHB + ACH (Fig. 3 C) and Pyruvate + ACH (Fig. 3  
674 D) are averaged.

675

676 Figure 8: Methods for analysis of flagellar movement.

677 (A) Analysis of bend angle. The bend angle of a flagellum was determined as follows: First,

678 measuring the angle between the tangents at two adjacent inflection points when flagellar bends  
679 reach at the center of flagellum (white circle). The angle was measured for both principal bends (a)  
680 and reverse bends (b), and bend angle is defined as a sum of both values. The bend angle was  
681 measured three times individually, and the bend angle of each spermatozoon was determined as a  
682 mean of them.

683 (B) Analysis of shear angle. Shear angle at point c in left picture was defined as the angle  
684 between the reference line at the base of the flagellum, usually parallel to the head axis, and the  
685 tangent at a point c. In the present experiment, shear angle was determined every 10  $\mu\text{m}$  on the  
686 flagellum from the base to the tip for 3 cycle of beating (plotted in right graph). Then, difference  
687 between the maximum and minimum values (arrows in right graph) was defined as a local amount  
688 of microtubule sliding.

689

690

691

692

693

694

695

696

697

698

699



## 700 References

- 701 **Austin, C. R.** (1985). Sperm maturation in the male and female genital tracts. In: *Biology of*  
702 *Fertilization vol. 2: Biology of the Sperm* (ed. C. B. Metz and A. Monroy), pp. 121-155. New  
703 York: Academic Press.
- 704 **Brown-Woodman, P. D. C., Mohri, H., Mohri, T., Suter, D. and White, I. G.** (1978).  
705 Mode of action of  $\alpha$ -chlorohdrin as a male anti-fertility agent. *Biochem. J.* **170**, 23-37.
- 706 **Cao, W., Haig-Ladewig, L., Gerton, G. L. and Moss, S. B.** (2006). Adenylate kinase 1 and  
707 2 are part of accessory structures in the mouse sperm flagellum. *Biol. Reprod.* **75**, 492-500.
- 708 **Danshina, P. V., Geyer, C. B., Dai, Q., Goulding, E. H., Willis, W. D., Kitto, G. B.,**  
709 **McCartney, J. R., Eddy, E. M. and O'Brien, D. A.** (2010). Phosphoglycerate kinase 2  
710 (PGK2) is essential for sperm function and male fertility in mice. *Biol. Reprod.* **82**, 136-145.
- 711 **Dzeja, P. and Terzic, A.** (2003). Phosphotransfer networks and cellular energetic. *J. Exp.*  
712 *Biol.* **206**, 2039-2047
- 713 **Dzeja, P., Terzic, A. and Wieringa, B.** (2004). Phosphotransfer dynamics in skeletal  
714 muscle from creatine kinase gene-deleted mice. *Mol. Cell Biochem.* **256/257**, 13–27.
- 715 **Ford, W. C. L.** (2006). Glycolysis and sperm motility: does a spoonful of sugar help the  
716 flagellum go round? *Hum. Reprod. Update.* **12**, 269-274.
- 717 **Ford, W. C. L. and Harrison, A.** (1985). The presence of glucose increases the lethal effect  
718 of  $\alpha$ -chlorohydrin on ram and boar spermatozoa in vitro. *J. Reprod. Fertil.* **73**,197–206.
- 719 **Ford WCL and Harrison A.** (1986). The concerted effect of  $\alpha$ -chlorohydrin and  
720 glucose on the ATP concentration in spermatozoa is associated with the accumulation of  
721 glycolytic intermediates. *J. Reprod. Fertil.* **77**, 537–545.

722 **Fujinoki, M., Ohtake, H. and Okuno, M.** (2001). Serine phosphorylation of flagellar  
723 proteins associated with the motility activation of hamster spermatozoa. *Biomed. Res.* **22**,  
724 45–58.

725 **Hiipakka, R. A. and Hammerstedt, R. H.** (1978). 2-Deoxyglucose transport and  
726 phosphorylation by bovine sperm. *Biol. Reprod.* **19**, 368-379.

727 **Hyne, R. V. and Edwards, K. P.** (1985). Influence of 2-deoxy-D-glucose and energy  
728 substrates on guinea pig sperm capacitation and acrosome reaction. *J. Reprod. Fertil.* **73**,  
729 59-69.

730 **Kamp, G., Busselmann, G. and Lauterwein, J.** (1996). Spermatozoa: models for studying  
731 regulatory aspects of energy metabolism. *Experientia.* **52**, 487-494

732 **Krisfalusi, M., Miki, K., Magyar, P. L. and O'Brien, D. A.** (2006). Multiple Glycolytic  
733 Enzymes Are Tightly Bound to the Fibrous Sheath of Mouse Spermatozoa. *Biol. Reprod.* **75**,  
734 270-278.

735 **Miki, K., Qu, W., Goulding, E. H., Willis, W. D., Bunch, D. O., Strader, L. F., Perreault,**  
736 **S. D., Eddy, E. M. and O'Brien, D. A.** (2004). Glyceraldehyde 3- phosphate  
737 dehydrogenase-S, a sperm specific glycolytic enzyme, is required for sperm motility and male  
738 fertility. *Proc. Natl. Acad. Sci.* **101**, 16501-16506.

739 **Mohri, H., Suter, D. A. I., Brown-Woodman, P. D. C, White, I. G. and Ridley, D. D.**  
740 (1975). Identification of the biochemical lesion produced by  $\alpha$ -chlorohydrin in spermatozoa.  
741 *Nature* **255**, 75-77.

742 **Mukai, C. and Okuno, M.** (2004). Glycolysis plays a major role for adenosine triphosphate  
743 supplementation in mouse sperm flagellar movement. *Biol. Reprod.* **71**, 540-547.

- 744 **Neves, A. R., Ramos, A., Shearman, C., Gasson, M. J., Almeida, J. S. and Santos, H.**  
745 (2000). Metabolic characterization of *Lactococcus lactis* deficient in lactate dehydrogenase  
746 using in vivo  $^{13}\text{C}$ -NMR. *Eur. J. Biochem.* **267**, 3859-3868.
- 747 **Nevo, A. C. and Rikmenspoel, R.** (1970). Diffusion of ATP in sperm flagella. *J. Theor. Biol.*  
748 **26**, 11-18
- 749 **Noda L.** (1973). Adenylate kinase In *The Enzymes: Vol. VIII.* (ed. P. D. Boyer), pp. 279-305.  
750 New York: Academic Press.
- 751 **Odet, F., Duan, C., Willis, W. D., Goulding, E. H., Kung, A., Eddy, E. M. and O'Brien,**  
752 **D. A.** (2008). Expression of the gene for mouse lactate dehydrogenase C (Ldhc) is required for  
753 male fertility. *Biol. Reprod.* **79**, 26-34.
- 754 **Odet, F., Gabel, S. A., Williams, J., London, R. E., Gouldberg, E., Kung, A. and Eddy,**  
755 **E. M.** (2011). Lactate dehydrogenase C (LDHC) and energy metabolism in mouse sperm. *Biol.*  
756 *Reprod.* **85**, 556-564
- 757 **Okuno, M. and Hiramoto, Y.** (1976). Mechanical stimulation of starfish sperm flagella. *J.*  
758 *Exp. Biol.* **65**, 401-413.
- 759 **Okuno, M. and Brokaw, C. J.** (1979). Inhibition of movement of triton-demembrated  
760 sea-urchin sperm flagella by  $\text{Mg}^{2+}$ ,  $\text{ATP}^{4-}$ , ADP and Pi. *J. Cell Sci.* **38**, 105-123.
- 761 **Olán, J., Klivényi, P., Gardián, G., Vécsei, L., Orosz, F., Kovacs, G. G., Westerhoff, H.**  
762 **V. and Ovádi, J.** (2008). Increased glucose metabolism and ATP level in brain tissue of  
763 Huntington's disease transgenic mice. *FEBS J.* **275**, 4740-4755.
- 764 **Pegoraro, B. and Lee, C. Y.** (1978). Purification and characterization of two isozymes of  
765 3-phosphoglycerate kinase from the mouse. *Biochim. Biophys. Acta* **522**, 423-433

766 **Samizo, K., Ishikawa, R., Nakamura, A. and Kohama, K.** (2001). A highly sensitive  
767 method for measurement of Myosin ATPase activity by Reversed-phase high performance  
768 liquid chromatography. *Anal. Biochem.* **293**, 212-215.

769 **Shingyoji, C., Yoshimura, K., Eshel, D., Takahashi, K. and Gibbons, I. R.** (1995). Effect  
770 of beat frequency of microtubule sliding in reactivates sea urchin sperm flagella under  
771 imposed head vibration. *J. Exp. Biol.* **198**, 645-653

772 **Si, Y. and Okuno, M.** (1995). Activation of mammalian sperm motility by regulation of  
773 microtubule sliding via cyclic adenosine 5'-monophosphate-dependent phosphorylation. *Biol.*  
774 *Reprod.* **53**, 1081-1087.

775 **Steeghs, K., Oerlemans, F. and Wieringa, B.** (1995). Mice deficient in ubiquitous  
776 mitochondrial creatine kinase are viable and fertile. *Biochim. Biophys. Acta* **1230**, 130-138

777 **Stevenson, D. and Jones, A. R.** (1985). Production of (S)-3-chlorolactaldehyde from  
778 (S)- $\alpha$ -chlorohydrin by boar spermatozoa and the inhibition of glyceraldehydes 3-phosphate  
779 dehydrogenase in vitro. *J. Reprod. Fert.* **74**, 157-165

780 **Takao, D. and Kamimura, S.** (2008). FRAP analysis of molecular diffusion inside  
781 sea-urchin spermatozoa. *J. Exp. Biol.* **211**, 3594-3600

782 **Tanaka, H., Takahashi, T., Iguchi, N., Kitamura, K., Miyagawa, Y., Tsujimura, A.,**  
783 **Matsumiya, K., Okuyama, A. and Nishimune, Y.** (2004). Ketone bodies could support the  
784 motility but not the acrosome reaction of mouse sperm. *Int. J. Androl.* **27**, 172-177.

785 **Tombes, R. M. and Shapiro, B. M.** (1985). Metabolite channelling: a phosphoryl creatine  
786 shuttle to mediate high energy phosphate transport between sperm mitochondrion and tail. *Cell*  
787 **41**, 325-334

788 **Tombes, R. M., Brokaw, C. J. and Shapiro, B. M.** (1987). Creatine kinase-dependent  
789 energy transport in sea urchin spermatozoa. *Biophys. J.* **52**, 75-86

790 **Welch, J. E., Brown, P. L., O'Brien, D. A., Magyar, P. L., Bunch, D. O., Mori, C. and**  
791 **Eddy, E. M.** (2000). Human glyceraldehydes 3-phosphate dehydrogenase-2 gene is expressed  
792 specifically in spermatogenic cells. *Int. J. Androl.* **21**, 328-338

793 **Westhoff, D. and Kamp, G.** (1995). Glyceraldehyde 3-phosphate dehydrogenase is bound  
794 to the fibrous sheath of mammalian spermatozoa. *J. Cell Sci.* **110**, 1821-1829

795 **Wolfgang, K. G. K. and Theodor, B.** (1970). 3- phosphoglycerate kinase from rabbit  
796 skeletal muscle and yeast. *Eur. J. Biochem.* **17**, 568-580

797 **Yano, Y. and Miki, N. T.** (1980). Sliding velocity between outer doublet microtubules of  
798 sea-urchin sperm axonemes. *J. Cell Sci.* **44**, 169-186.

799 **Yeung, C. H., Anapolski, M. and Cooper, T.** (2002). Measurement of volume changes in  
800 mouse spermatozoa using an electronic sizing analyzer and a flow cytometer: validation and  
801 application to an infertile mouse model. *J. Androl.* **23**, 522-528.

802

803

804

805

806

807

808

809

810 **Tables**

811

812 Table 1. Difference of beat frequency, bend angle, sliding velocity and waveform of sperm

813 flagella depends on energy substrates.

|                            | Glc n=16                                                                           | Pyr n=9                                                                             | BHB n=17                                                                             |
|----------------------------|------------------------------------------------------------------------------------|-------------------------------------------------------------------------------------|--------------------------------------------------------------------------------------|
| Beat Frequency (Hz)        | 16.3±0.70                                                                          | 14.6±0.72                                                                           | 16.9±1.13                                                                            |
| Bend Angle (rad)           | 2.55±0.12                                                                          | 2.62±0.07                                                                           | 2.63±0.16                                                                            |
| Sliding Velocity (rad/sec) | 41.0±1.91                                                                          | 38.1±1.60                                                                           | 42.6±2.26                                                                            |
| Motility (%)               | 55.8±4.60                                                                          | 58.8±2.43                                                                           | 56.3±3.92                                                                            |
| Waveform                   |  |  |  |

814

815 Difference in beat frequency, bend angle, sliding velocity, percentage of motile sperm and typical

816 waveform by substrates are indicated. Data are represented as mean value ± s. e. m. No

817 significant difference in motility parameters was recognized. Concentration of substrates was

818 10 mmol l<sup>-1</sup>.

819

820

821 Table 2. Parameters used for computations of Pi transport in flagella

| Parameters                                                                                                        | Value                                 | Reference                                              |
|-------------------------------------------------------------------------------------------------------------------|---------------------------------------|--------------------------------------------------------|
| Flagellar length                                                                                                  | 100 $\mu\text{m}$                     | See text                                               |
| Diffusion coefficient for ANP                                                                                     | 60 $\mu\text{m}^2\text{s}^{-1}$       | Takao and Kamimura (2008)                              |
| Diffusion coefficient for 3PG and 1, 3 BPG                                                                        | 104 $\mu\text{m}^2\text{s}^{-1}$      | Same as above                                          |
| PGK substrates concentration (Total 3PG and 1, 3BPG)                                                              | 0.155 $\text{mmol l}^{-1}$            | Determined by metabolomic analysis                     |
| Total adenine nucleotide                                                                                          | 11.6 $\text{mmol l}^{-1}$             | Same as above                                          |
| $Q_{1F}$                                                                                                          | 0.134 $\text{mmol l}^{-1}/\text{sec}$ | Odet et al (2011)                                      |
| $K_I$ ( $K_m$ of ATPase from ATP, from ATP concentration for half-maximal beat frequency of demembrated flagella) | 0.14 $\text{mmol l}^{-1}$             | Ishijima, personal data                                |
| $K_i$ (for inhibition of flagellar beat frequency by ADP)                                                         | 0.28 $\text{mmol l}^{-1}$             | Okuno and Brokaw (1979)                                |
| $K_{mP}$ (PGK2 $K_m$ value for 3PG)                                                                               | 1.55 $\text{mmol l}^{-1}$             | Pegoraro and Lee (1978)<br>Wolfgang and Theodor (1970) |
| $K_{mT}$ (PGK2 $K_m$ value for ATP)                                                                               | 0.32 $\text{mmol l}^{-1}$             | Same as above                                          |
| $K_{mB}$ (PGK2 $K_m$ value for 1, 3BPG)                                                                           | 0.0022 $\text{mmol l}^{-1}$           | Same as above                                          |
| $K_{mD}$ (PGK2 $K_m$ value for ADP)                                                                               | 0.16 $\text{mmol l}^{-1}$             | Same as above                                          |
| $Q_{2R}/Q_{2F}$ (ratio of reverse to forward PGK2)                                                                | 2.71                                  | Same as above                                          |
| $K_A$ (myokinase $K_m$ value for ATP)                                                                             | 0.3 $\text{mmol l}^{-1}$              | Noda, (1973) [23]                                      |
| $K_N$ (myokinase $K_m$ value for ADP)                                                                             | 0.3 $\text{mmol l}^{-1}$              | Same as above                                          |
| $K_M$ (myokinase $K_m$ value for AMP)                                                                             | 0.3 $\text{mmol l}^{-1}$              | Same as above                                          |
| $Q_{3R}/Q_{3F}$ (ratio of reverse to forward adenylate kinase)                                                    | 1.0                                   | Same as above                                          |
| Cytosolic volume                                                                                                  | 53.5 fL                               | Yeung et al., (2002) [40]                              |

822

823

824

825 **Figures**

826 (A) Beat frequency

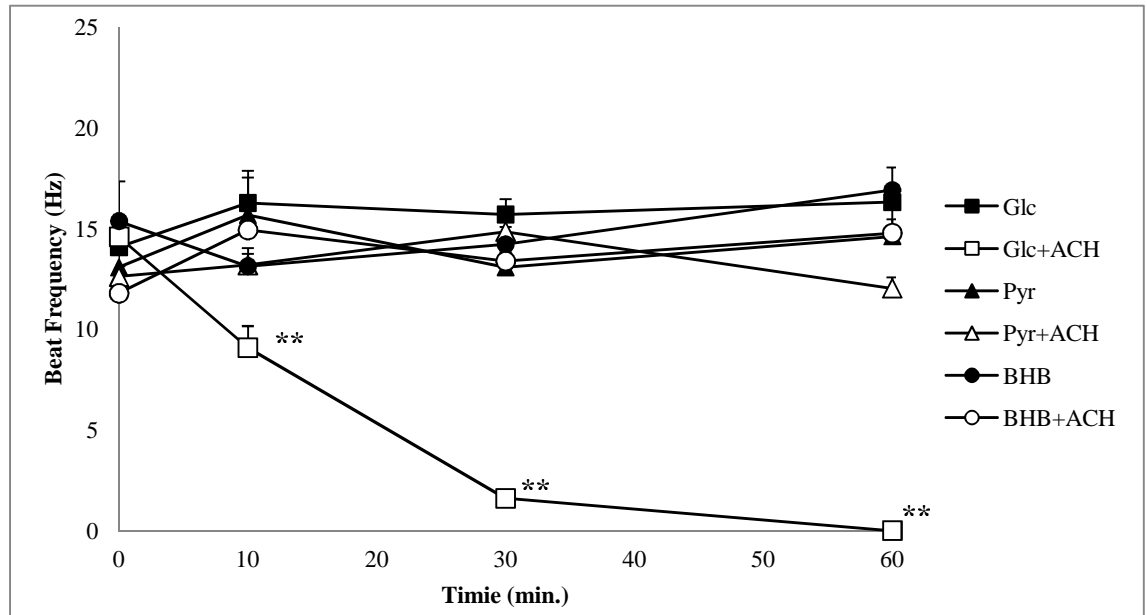

827

828 (B) Bend angle

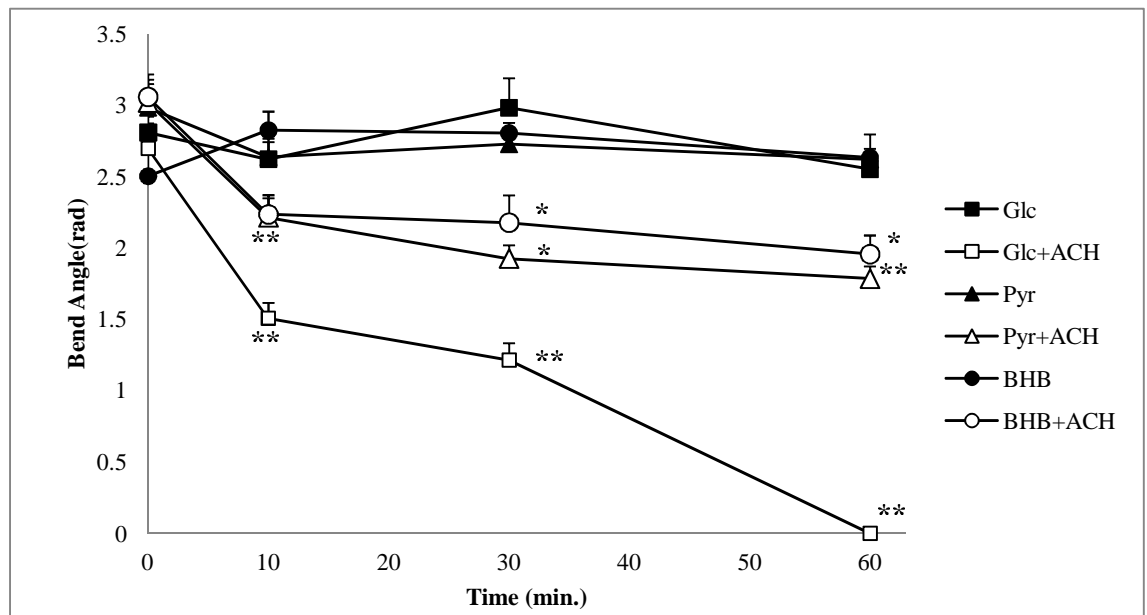

829

830

Figure 1: Effect of ACH on sperm flagellar motility in the presence of various substrates.

831



832

833 (C) Shear angle

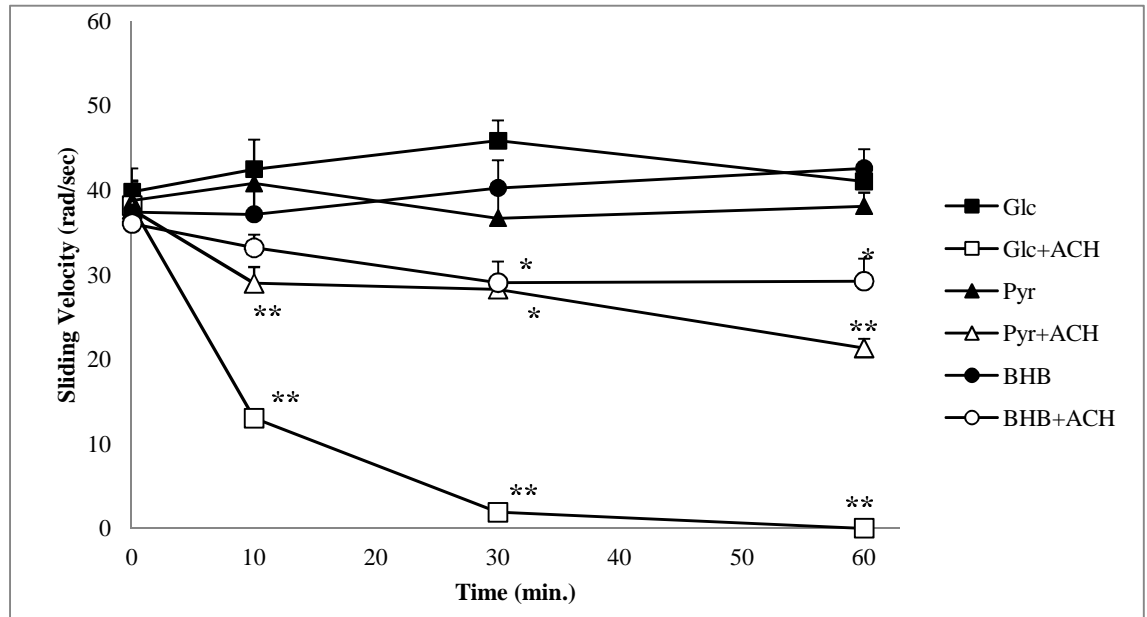

834

835 Figure 1: Effect of ACH on sperm flagellar motility in the presence of various substrates.

836

837

838

(A)

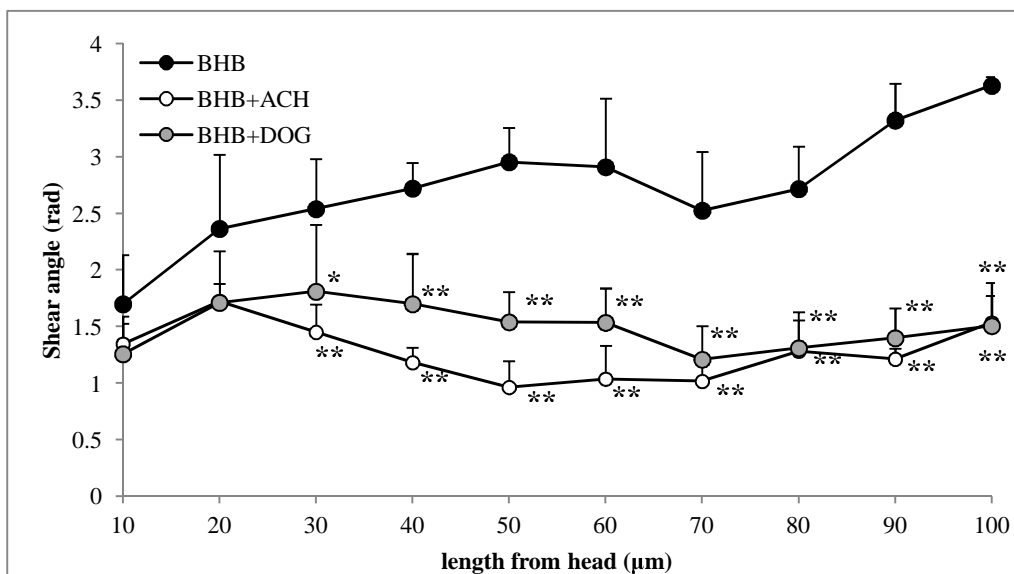

839

840

(B)

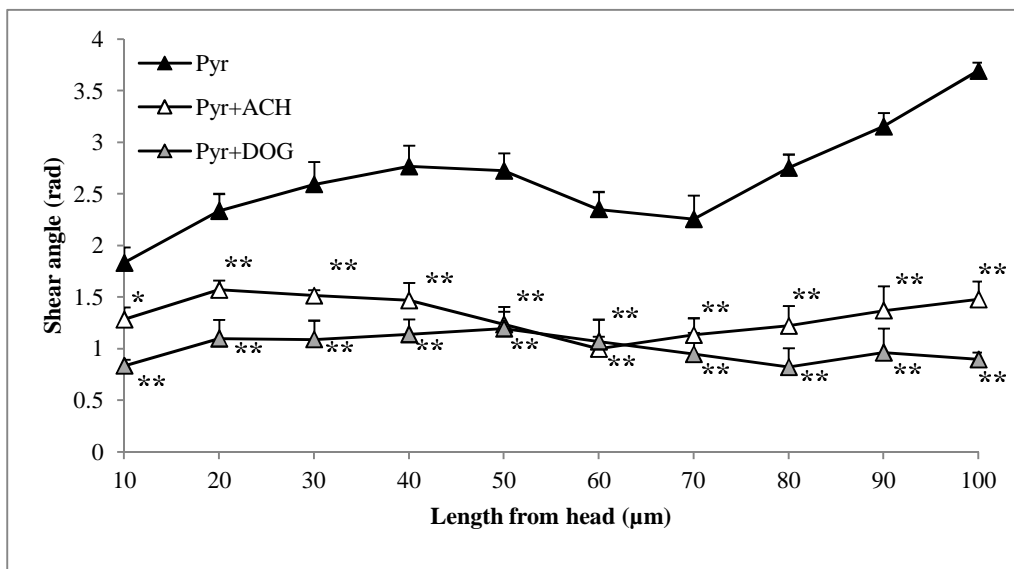

841

842

Figure 2: Changes of shear angle along the glycolysis-inhibited sperm flagella

843

844

845

846

(C)

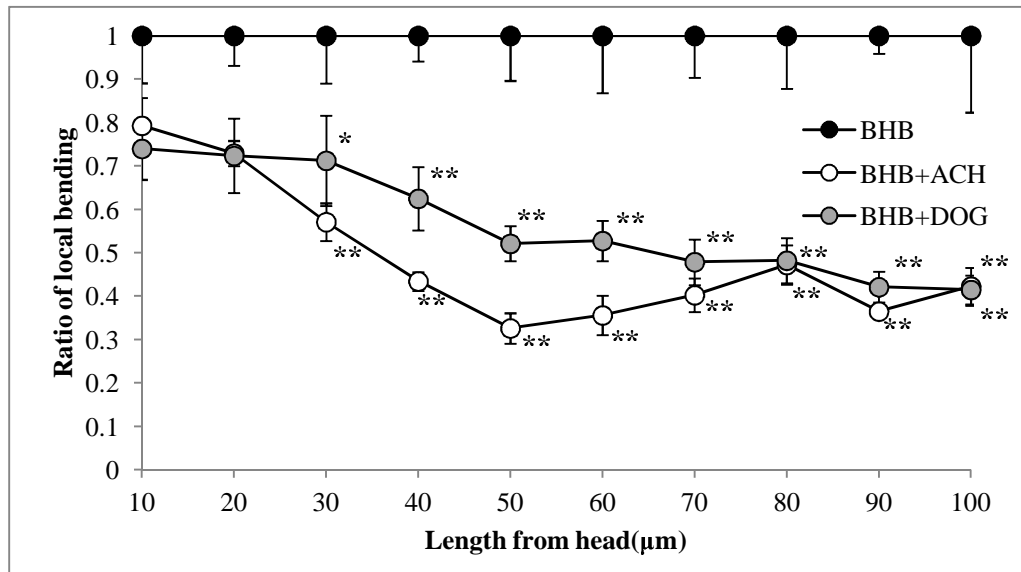

847

848

(D)

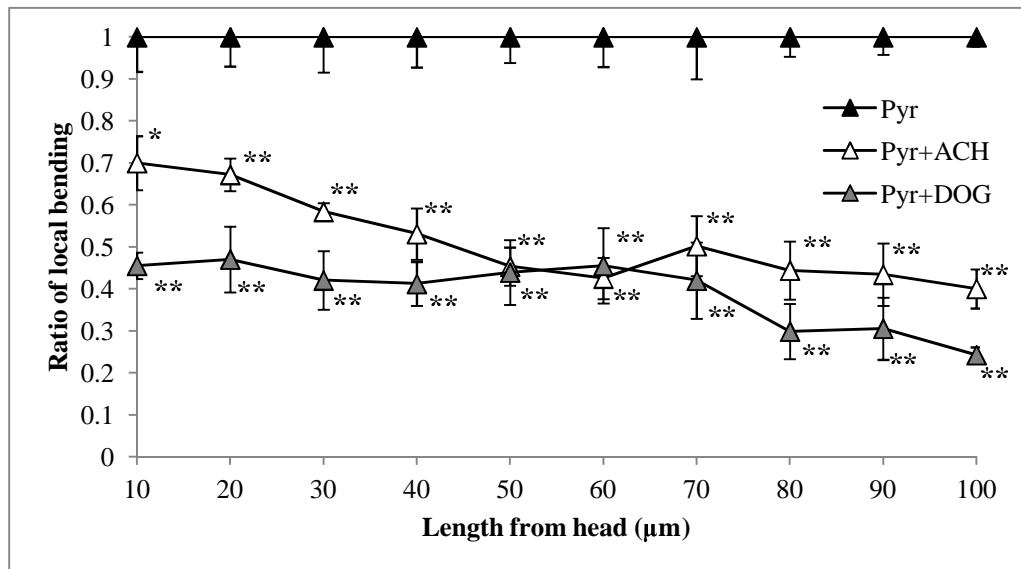

849

850

Figure 2: Changes in ratio of local bending along the glycolysis-inhibited sperm flagella

851

852

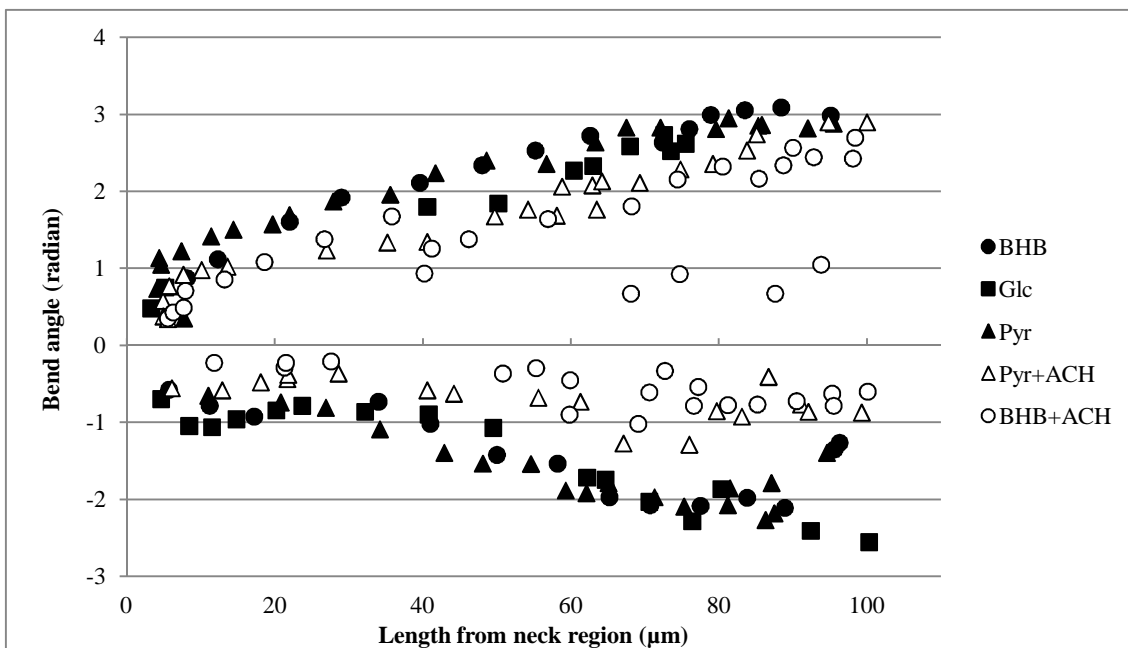

853

854 Figure 3: Scattergram of typical changes of local bend angle with the length of flagella

855

856

857

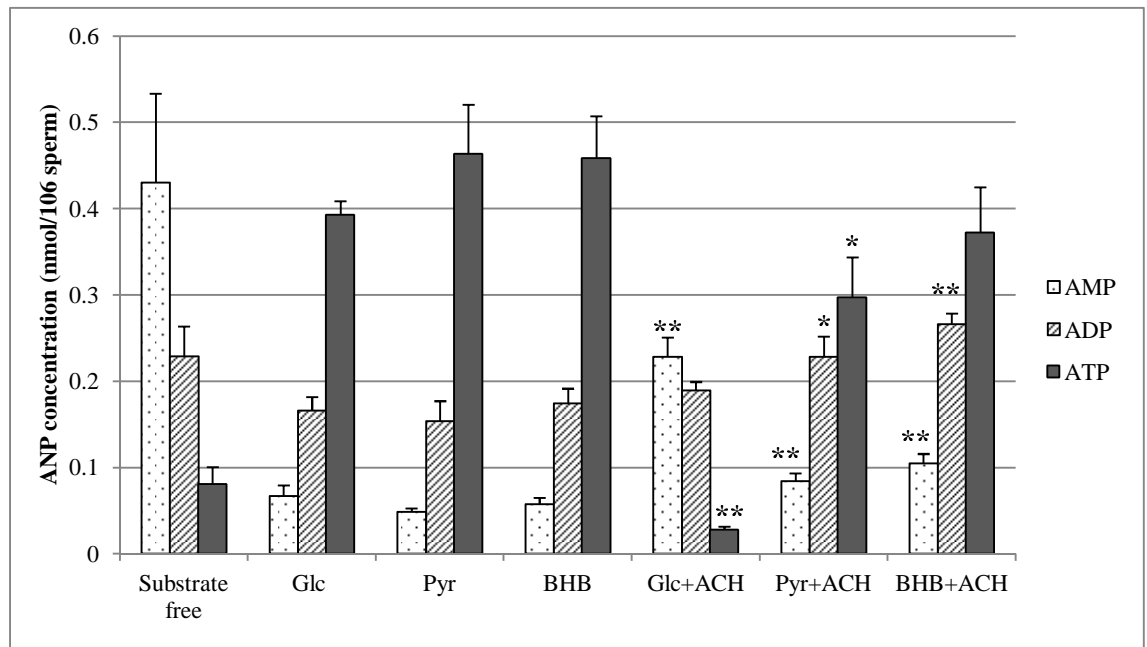

858

859

Figure 4: Effect of glycolytic inhibitor on the content of ANP in sperm.

860

861 (A) ATP concentration profile along flagellum

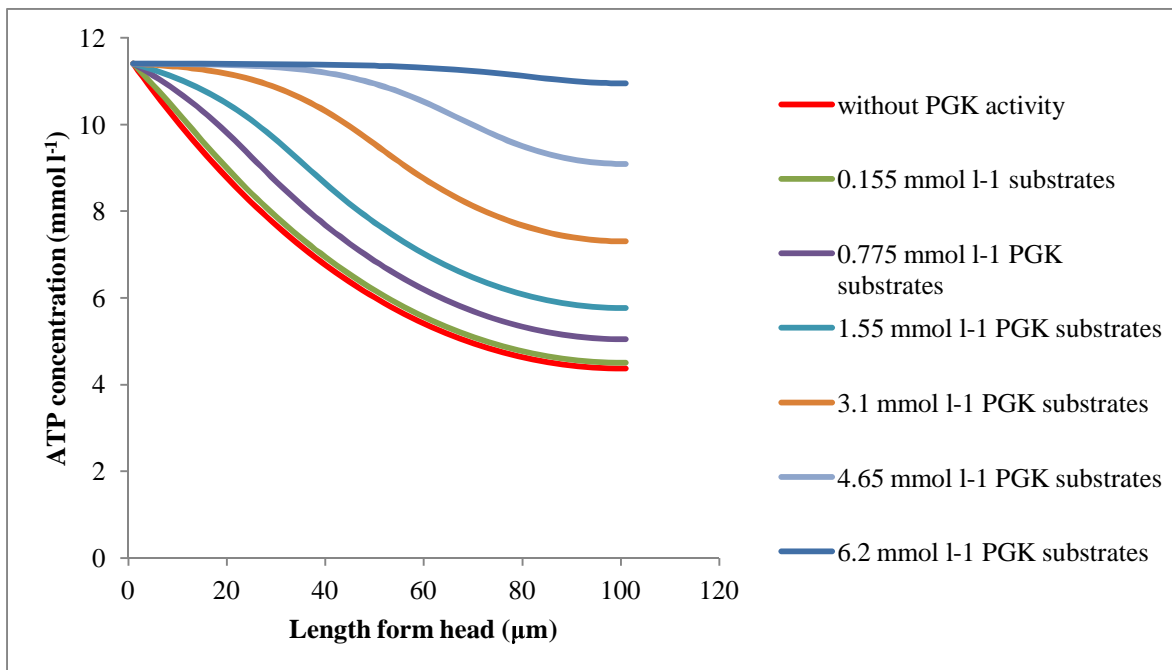

862

863

864 (B) ADP concentration profile along flagellum

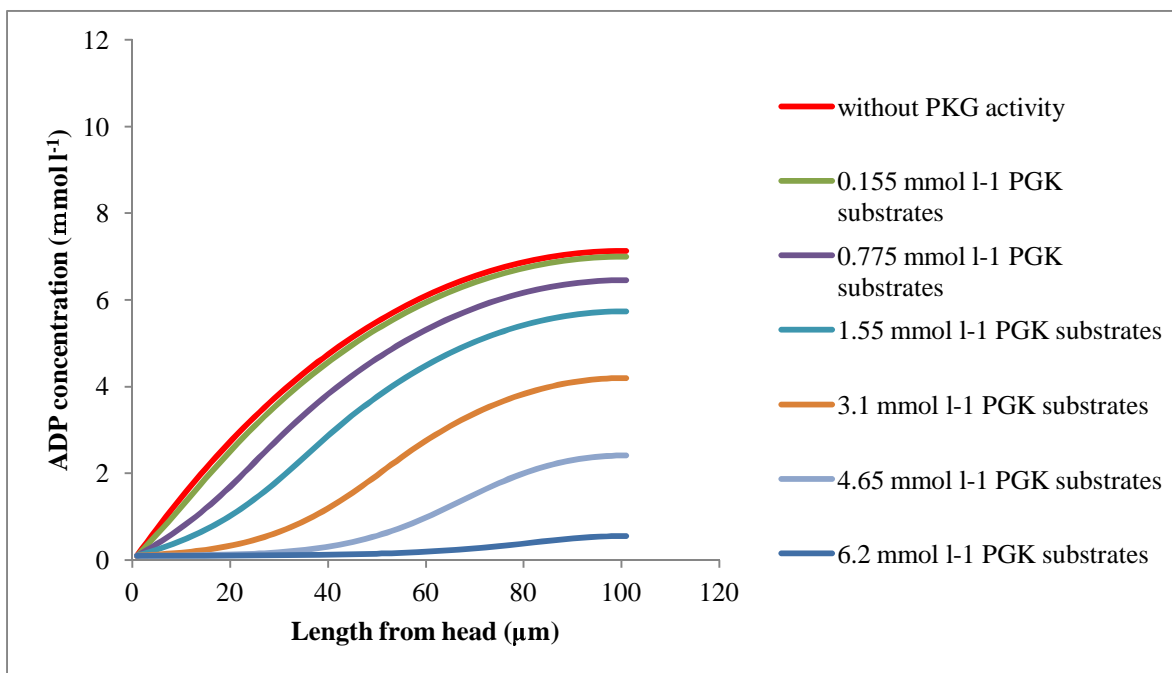

865

866

867 (C) ATPase activity profile along flagellum

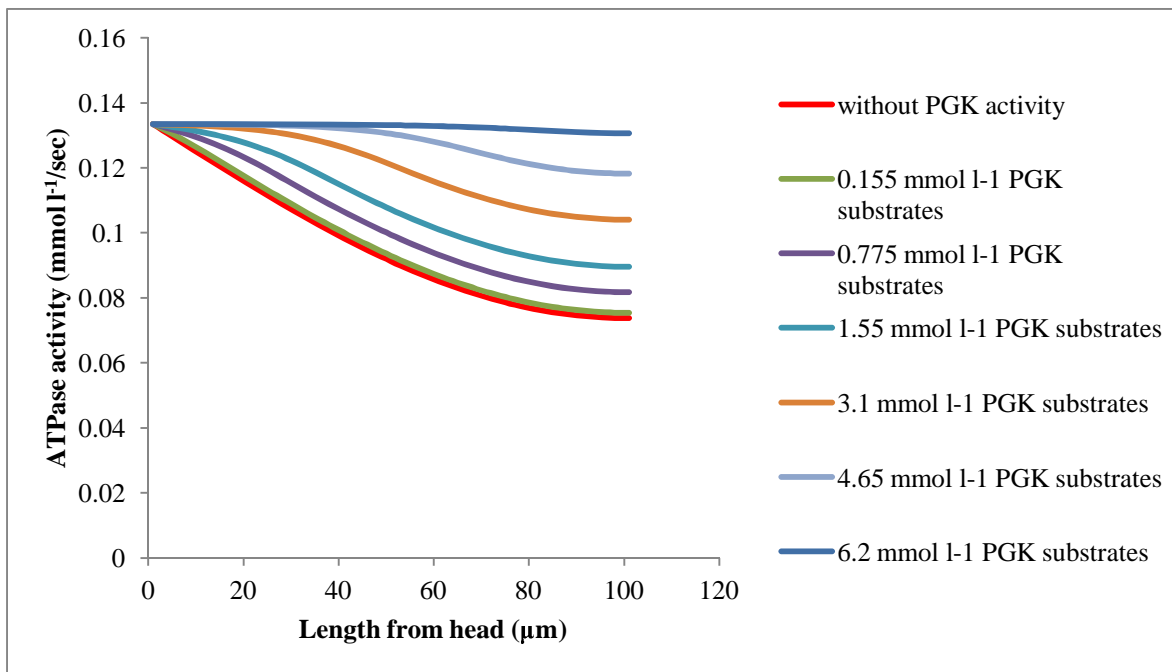

868

869

870 Figure 5: Simulation of high energy phosphoryls diffusion along the flagellum.

871



872

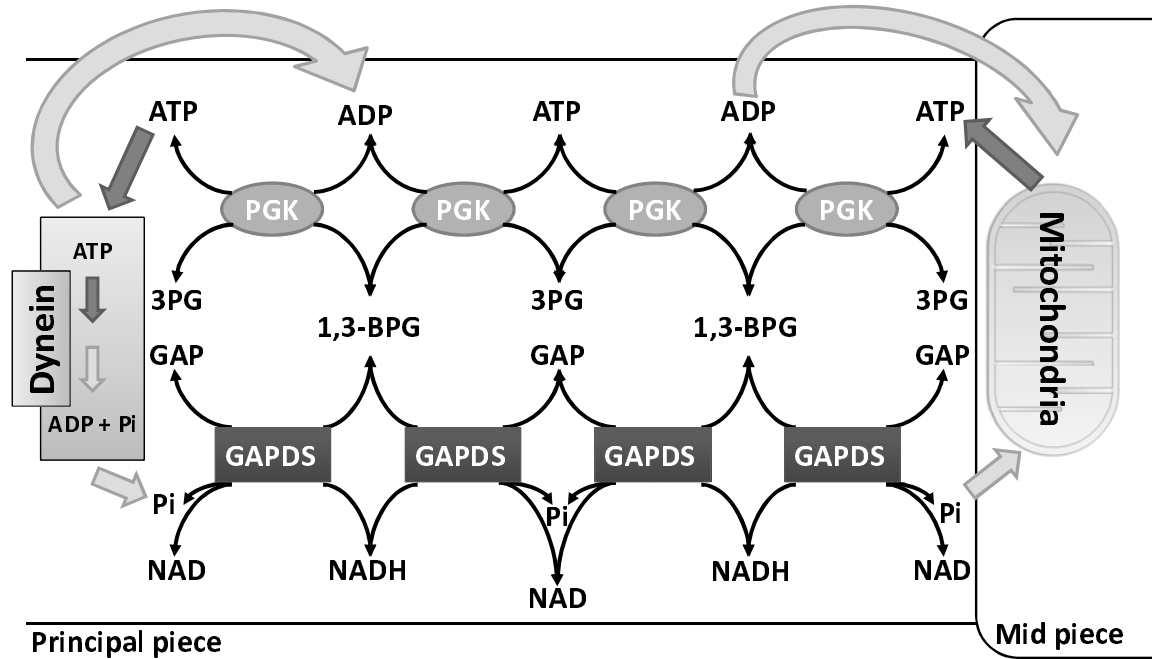

873

874 Figure 6: Schematic model of energy transfer system by glycolysis

875

876

877

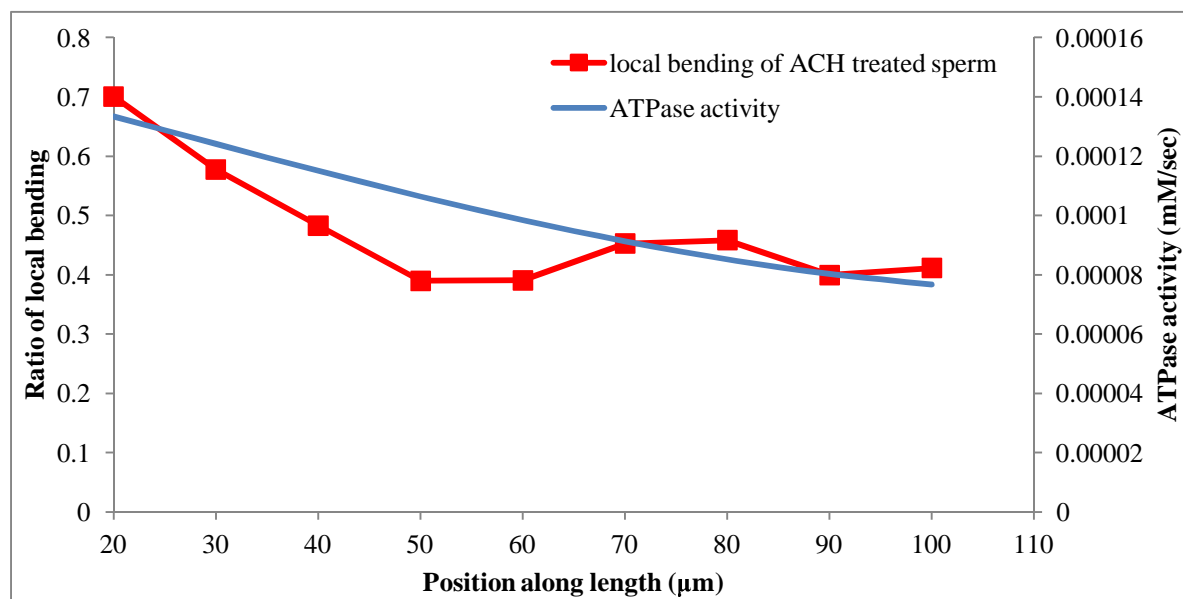

878

879 Figure 7: Superimposed schematic model of energy transfer system without glycolysis to the flagellar

880

local bending inhibited by ACH

881

882

883

884 (A) Bend angle

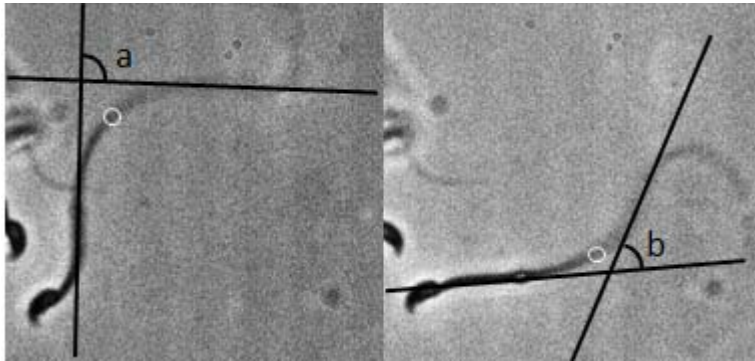

885

886 (B) Shear angle

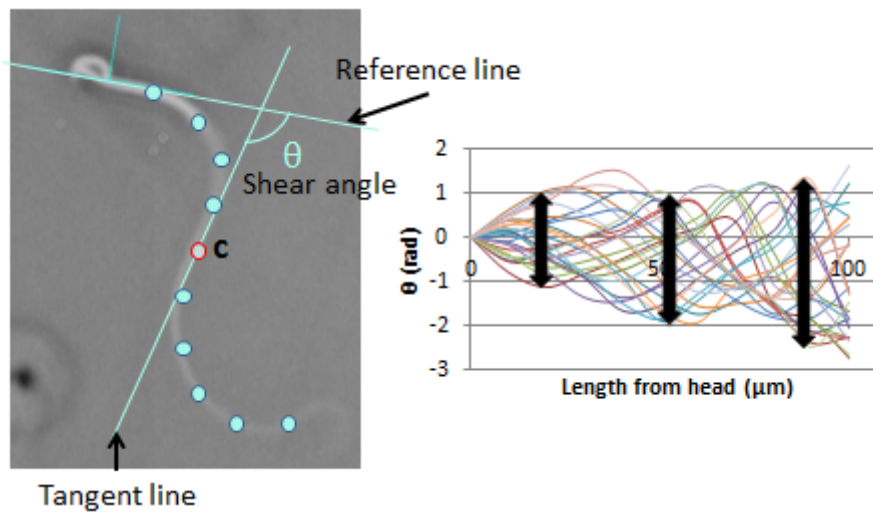

887

888 Figure 8: Methods for analysis of flagellar movement

889

1 **Tables**

2

3 Table 1. Difference of beat frequency, bend angle, sliding velocity and waveform of sperm flagella  
4 depends on energy substrates.

|                            | Glc n=16                                                                           | Pyr n=9                                                                             | BHB n=17                                                                             |
|----------------------------|------------------------------------------------------------------------------------|-------------------------------------------------------------------------------------|--------------------------------------------------------------------------------------|
| Beat Frequency (Hz)        | 16.3±0.70                                                                          | 14.6±0.72                                                                           | 16.9±1.13                                                                            |
| Bend Angle (rad)           | 2.55±0.12                                                                          | 2.62±0.07                                                                           | 2.63±0.16                                                                            |
| Sliding Velocity (rad/sec) | 41.0±1.91                                                                          | 38.1±1.60                                                                           | 42.6±2.26                                                                            |
| Motility (%)               | 55.8±4.60                                                                          | 58.8±2.43                                                                           | 56.3±3.92                                                                            |
| Waveform                   |  |  |  |

5

6 Difference in beat frequency, bend angle, sliding velocity, percentage of motile sperm and typical  
7 waveform by substrates are indicated. Data are represented as mean value ± s. e. m. No significant  
8 difference in motility parameters was recognized. Concentration of substrates was 10 mmol l<sup>-1</sup>.

9

10

11 Table 2. Parameters used for computations of Pi transport in flagella

| Parameters                                                                                                                          | Value                                 | Reference                                              |
|-------------------------------------------------------------------------------------------------------------------------------------|---------------------------------------|--------------------------------------------------------|
| Flagellar length                                                                                                                    | 100 $\mu\text{m}$                     | See text                                               |
| Diffusion coefficient for ANP                                                                                                       | 60 $\mu\text{m}^2\text{s}^{-1}$       | Takao and Kamimura (2008)                              |
| Diffusion coefficient for 3PG and 1, 3 BPG                                                                                          | 104 $\mu\text{m}^2\text{s}^{-1}$      | Same as above                                          |
| PGK substrates concentration (Total 3PG and 1, 3BPG)                                                                                | 0.155 $\text{mmol l}^{-1}$            | Determined by metabolomic analysis                     |
| Total adenine nucleotide                                                                                                            | 11.6 $\text{mmol l}^{-1}$             | Same as above                                          |
| $Q_{\text{IF}}$                                                                                                                     | 0.134 $\text{mmol l}^{-1}/\text{sec}$ | Odet et al (2011)                                      |
| $K_{\text{I}}$ ( $K_{\text{m}}$ of ATPase from ATP, from ATP concentration for half-maximal beat frequency of demembrated flagella) | 0.14 $\text{mmol l}^{-1}$             | Ishijima, personal data                                |
| $K_{\text{i}}$ (for inhibition of flagellar beat frequency by ADP)                                                                  | 0.28 $\text{mmol l}^{-1}$             | Okuno and Brokaw (1979)                                |
| $K_{\text{mP}}$ (PGK2 $K_{\text{m}}$ value for 3PG)                                                                                 | 1.55 $\text{mmol l}^{-1}$             | Pegoraro and Lee (1978)<br>Wolfgang and Theodor (1970) |
| $K_{\text{mT}}$ (PGK2 $K_{\text{m}}$ value for ATP)                                                                                 | 0.32 $\text{mmol l}^{-1}$             | Same as above                                          |
| $K_{\text{mB}}$ (PGK2 $K_{\text{m}}$ value for 1, 3BPG)                                                                             | 0.0022 $\text{mmol l}^{-1}$           | Same as above                                          |
| $K_{\text{mD}}$ (PGK2 $K_{\text{m}}$ value for ADP)                                                                                 | 0.16 $\text{mmol l}^{-1}$             | Same as above                                          |
| $Q_{2\text{R}}/Q_{2\text{F}}$ (ratio of reverse to forward PGK2)                                                                    | 2.71                                  | Same as above                                          |
| $K_{\text{A}}$ (myokinase $K_{\text{m}}$ value for ATP)                                                                             | 0.3 $\text{mmol l}^{-1}$              | Noda, (1973) [23]                                      |
| $K_{\text{N}}$ (myokinase $K_{\text{m}}$ value for ADP)                                                                             | 0.3 $\text{mmol l}^{-1}$              | Same as above                                          |
| $K_{\text{M}}$ (myokinase $K_{\text{m}}$ value for AMP)                                                                             | 0.3 $\text{mmol l}^{-1}$              | Same as above                                          |
| $Q_{3\text{R}}/Q_{3\text{F}}$ (ratio of reverse to forward adenylate kinase)                                                        | 1.0                                   | Same as above                                          |
| Cytosolic volume                                                                                                                    | 53.5 fL                               | Yeung et al., (2002) [40]                              |

12

13

14

15 **Figures**

## 16 (A) Beat frequency

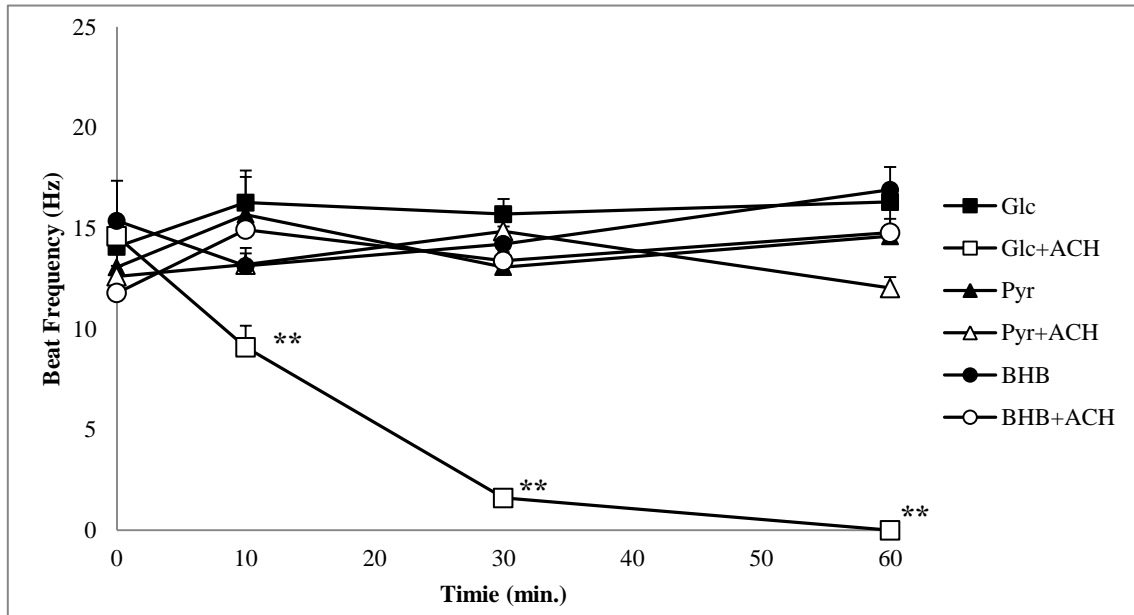

17

## 18 (B) Bend angle

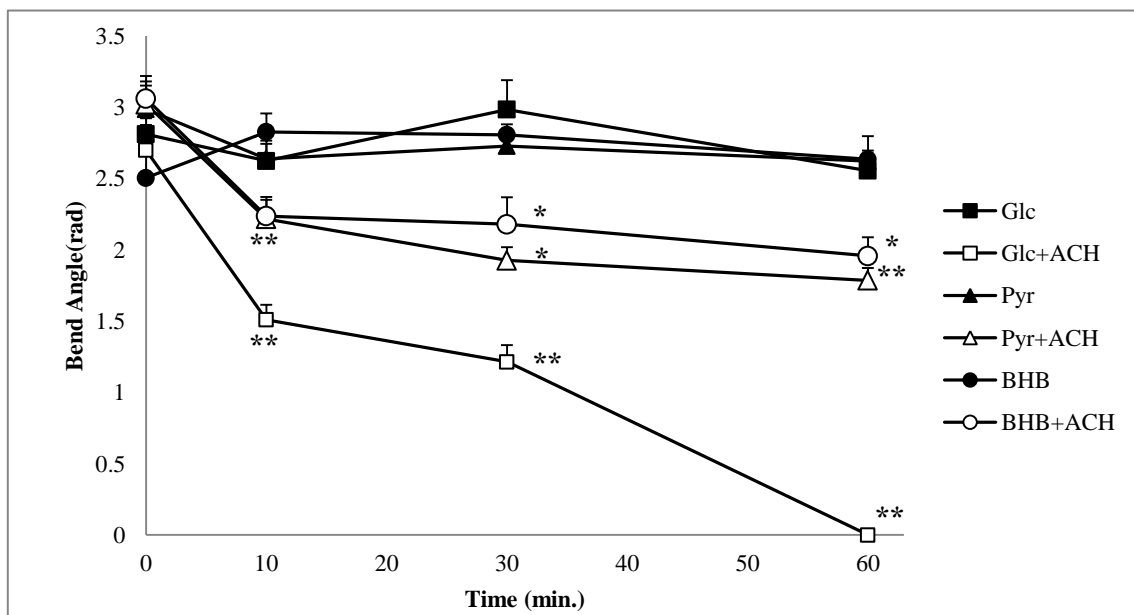

19

20 Figure 1: Effect of ACH on sperm flagellar motility in the presence of various substrates.

21

22

23 (C) Shear angle

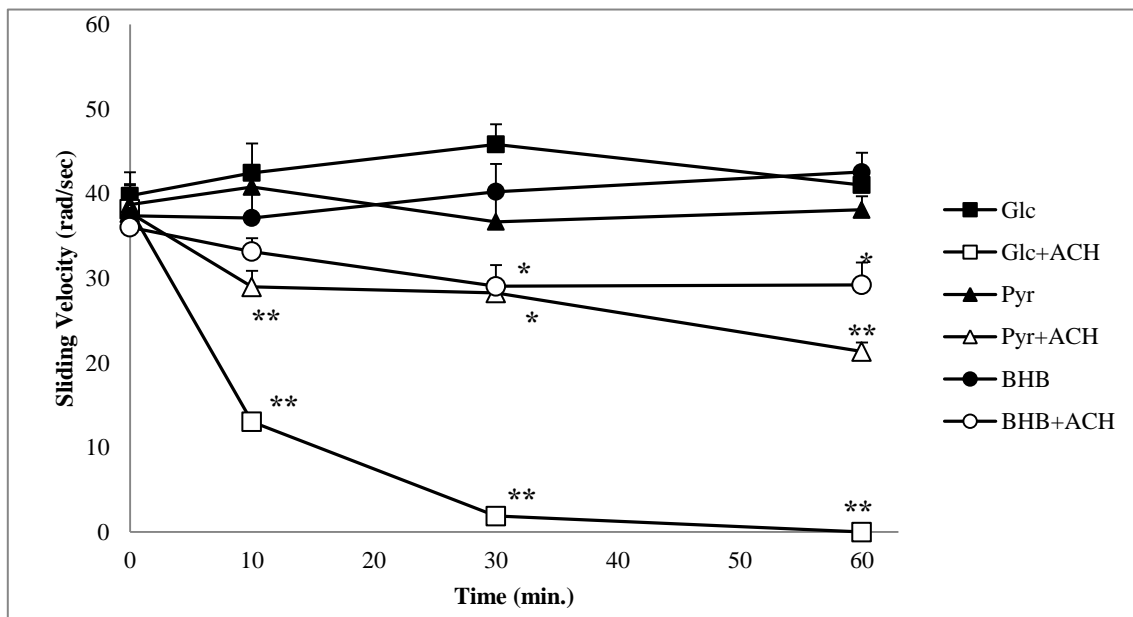

24

25 Figure 1: Effect of ACH on sperm flagellar motility in the presence of various substrates.

26

27

28

(A)

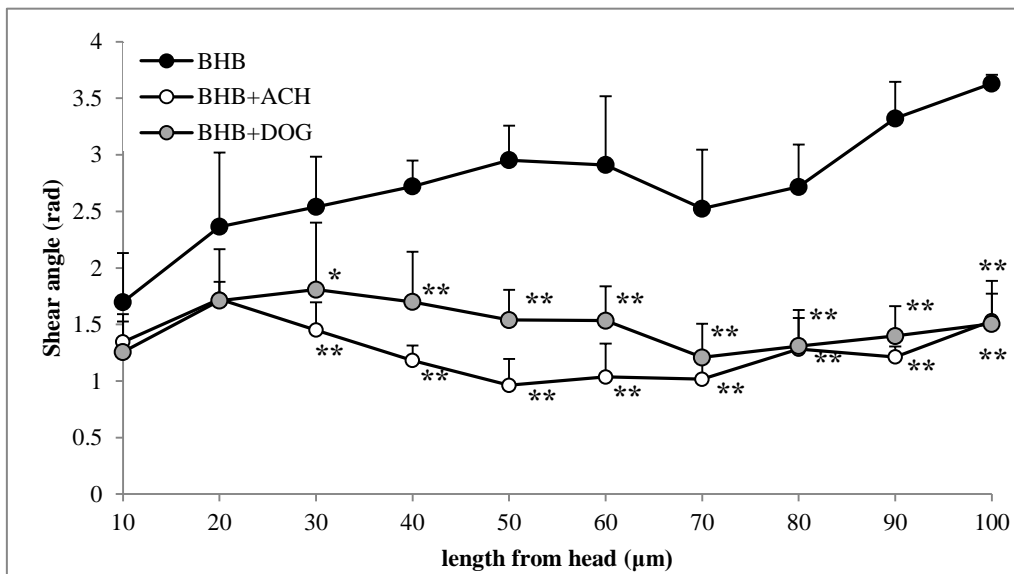

29

30

(B)

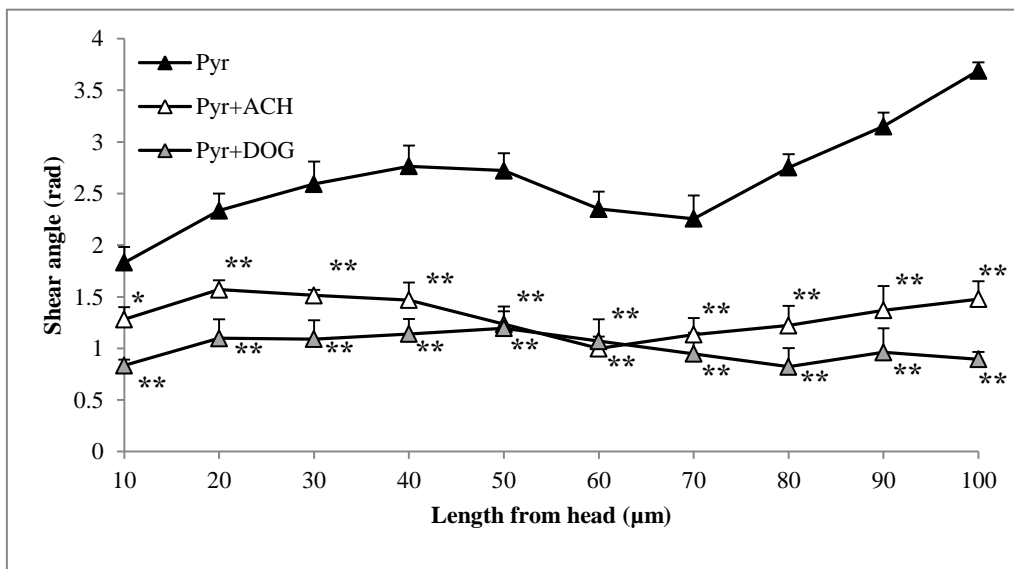

31

32

Figure 2: Changes of shear angle along the glycolysis-inhibited sperm flagella

33

34

35



36

(C)

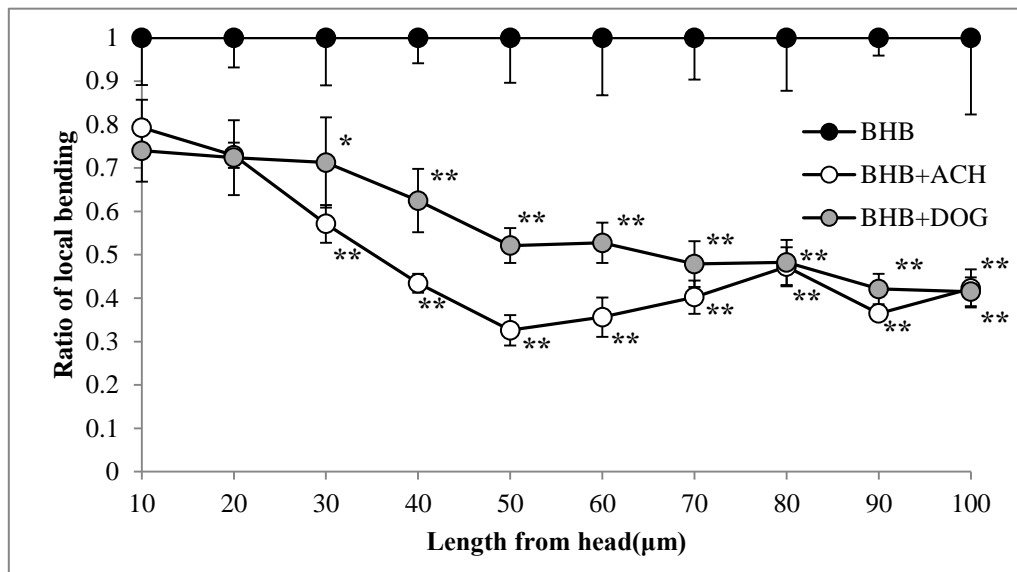

37

38

(D)

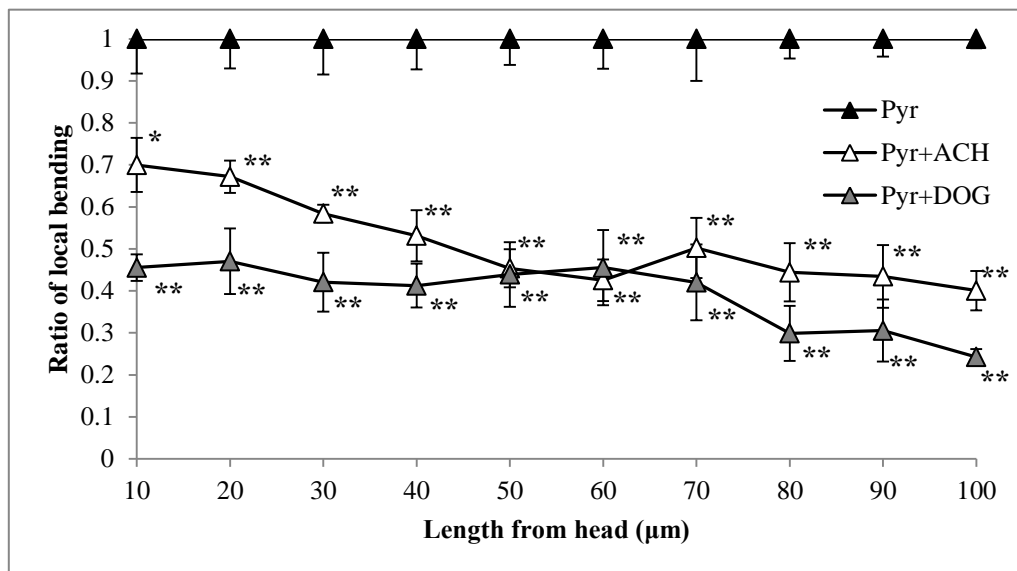

39

40

Figure 2: Changes in ratio of local bending along the glycolysis-inhibited sperm flagella

41

42

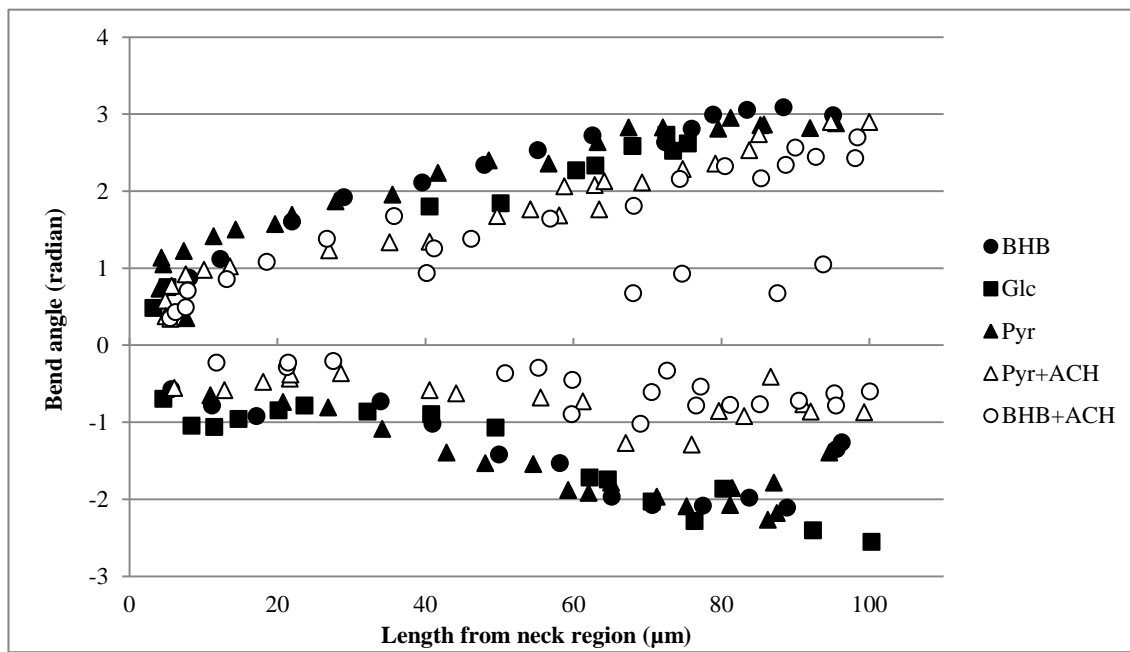

47

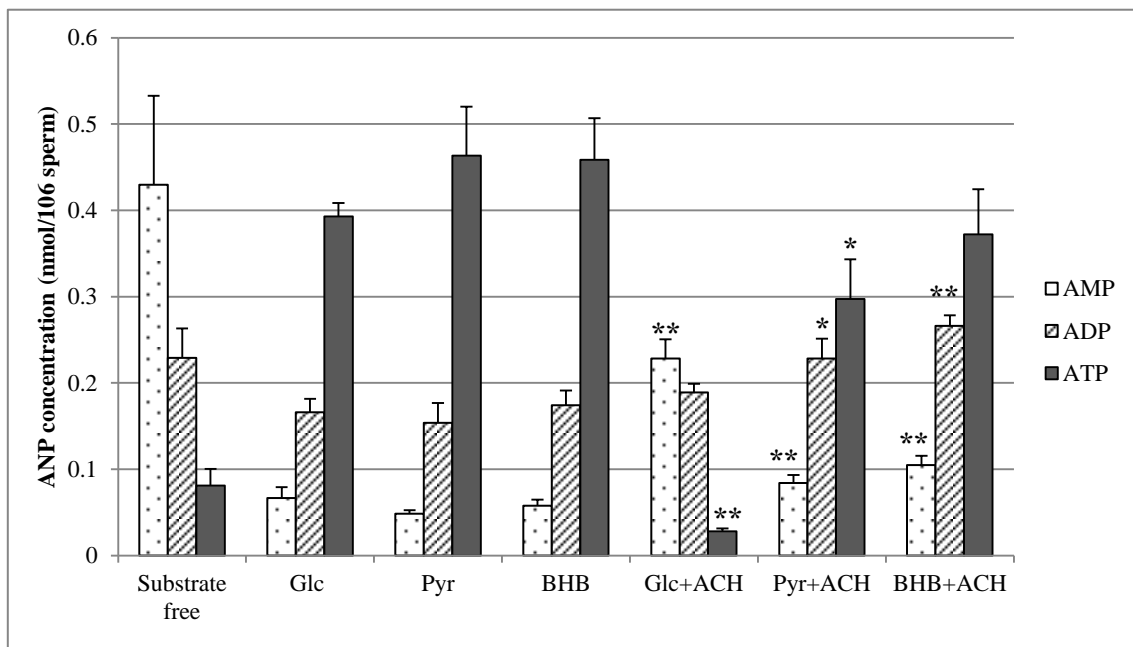

48

49 Figure 4: Effect of glycolytic inhibitor on the content of ANP in sperm.

50

51 (A) ATP concentration profile along flagellum

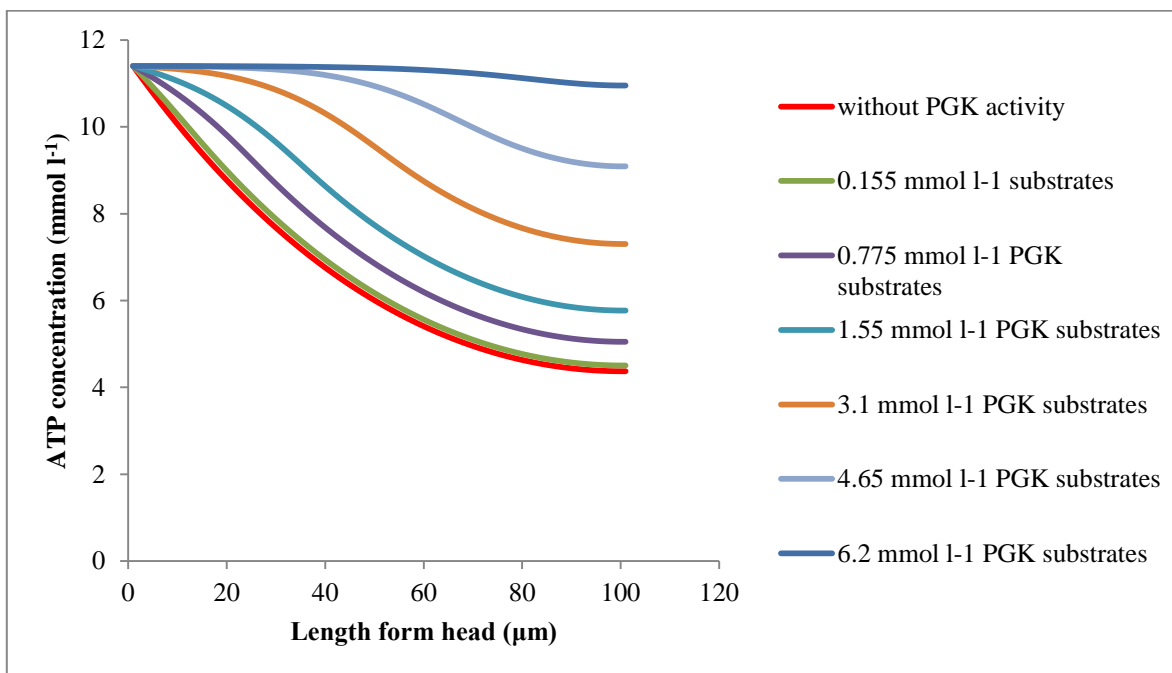

52

53

54 (B) ADP concentration profile along flagellum

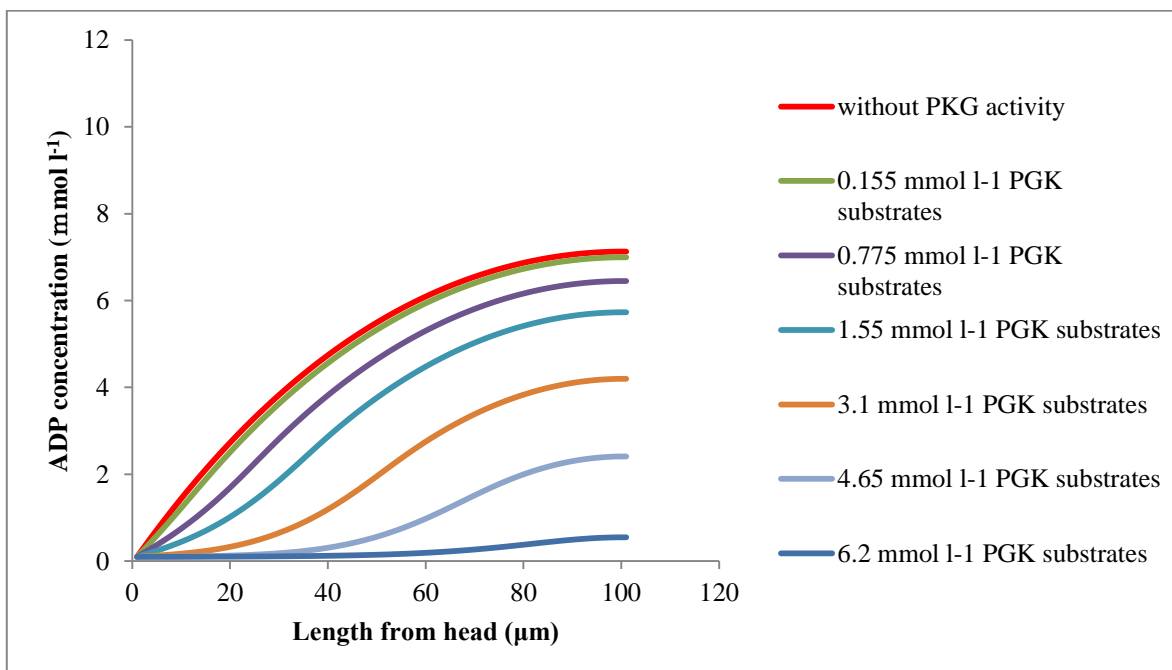

55

56

## 57 (C) ATPase activity profile along flagellum

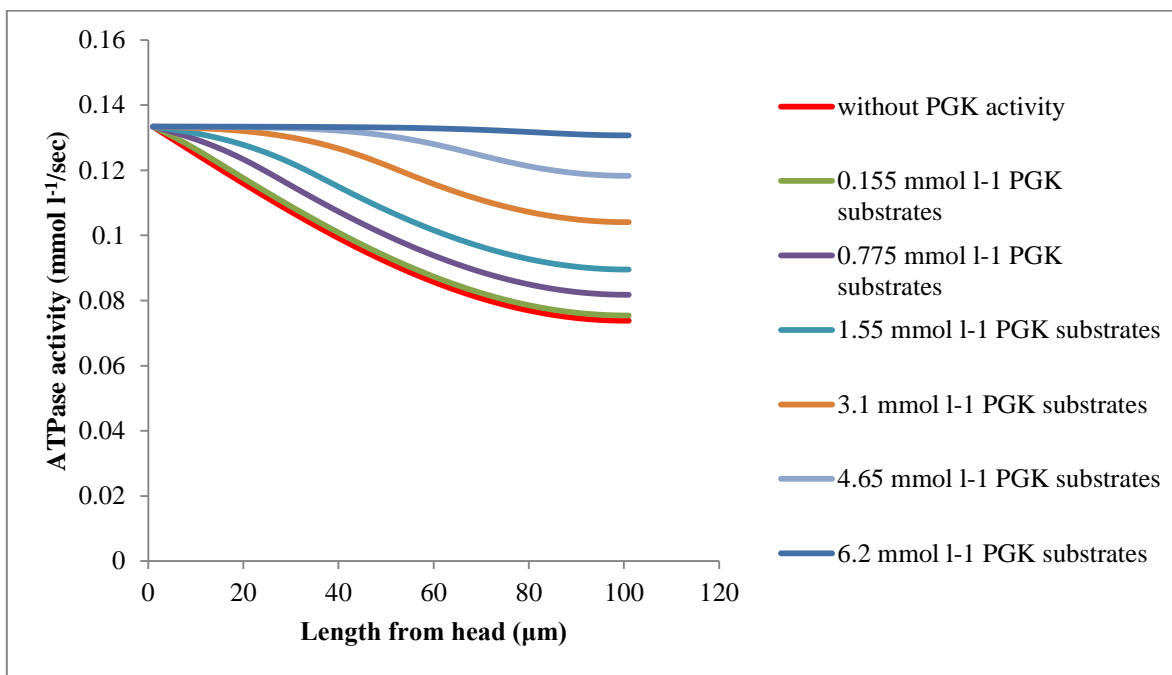

58

59

60 Figure 5: Simulation of high energy phosphoryls diffusion along the flagellum.

61

62

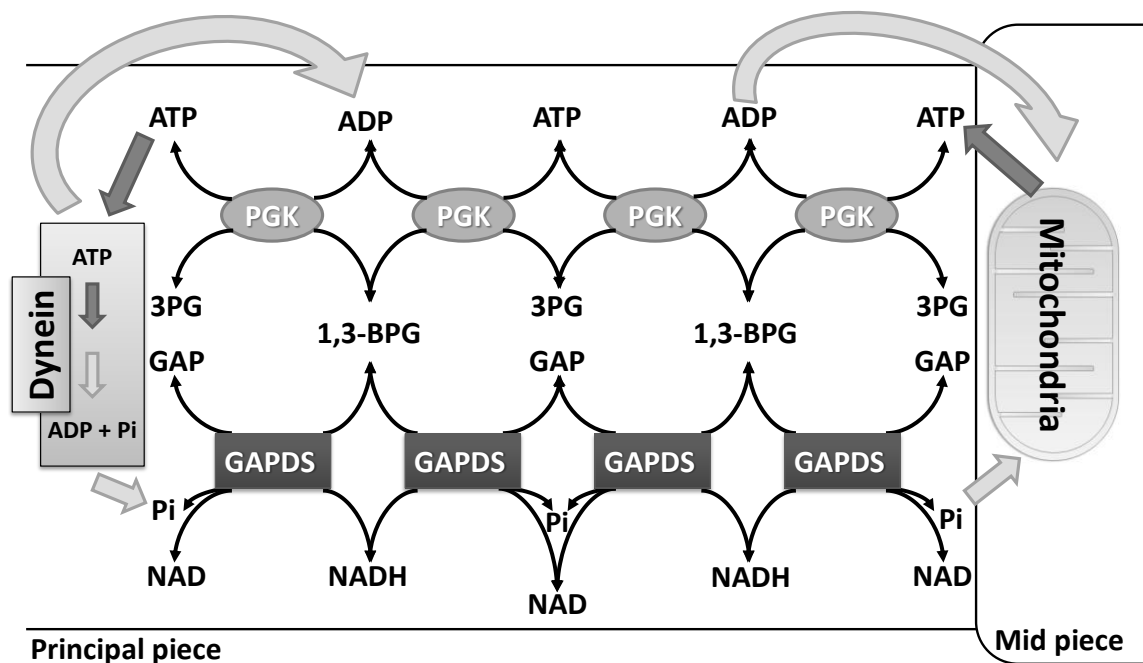

63

64 Figure 6: Schematic model of energy transfer system by glycolysis

65

66

67

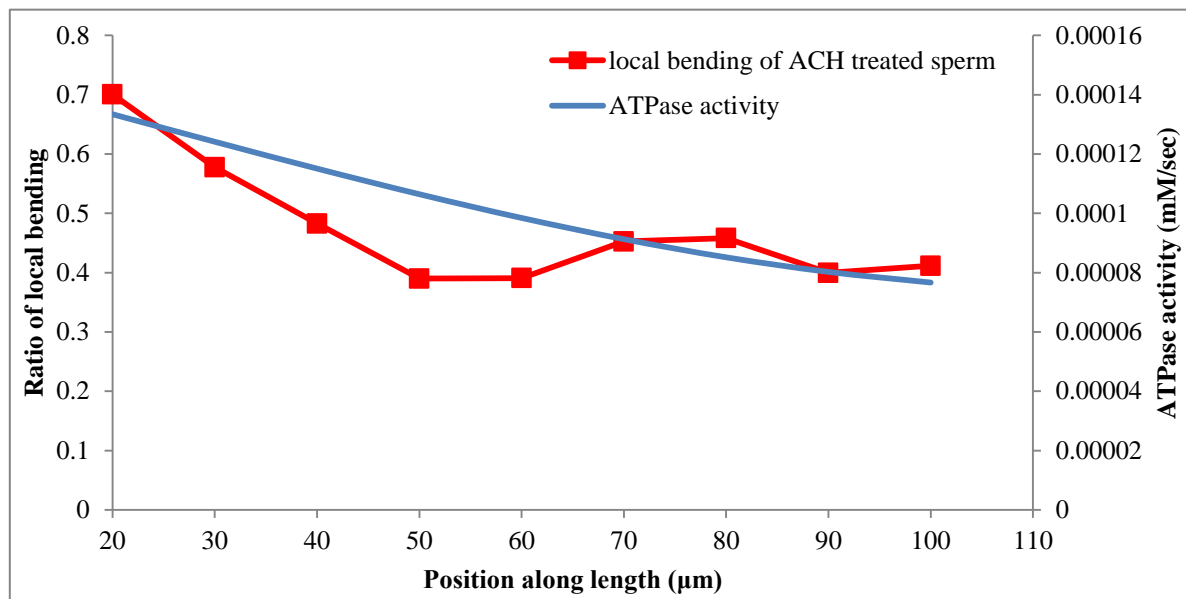

68

69 Figure 7: Superimposed schematic model of energy transfer system without glycolysis to the flagellar

70 local bending inhibited by ACH

71

72

73

74 (A) Bend angle

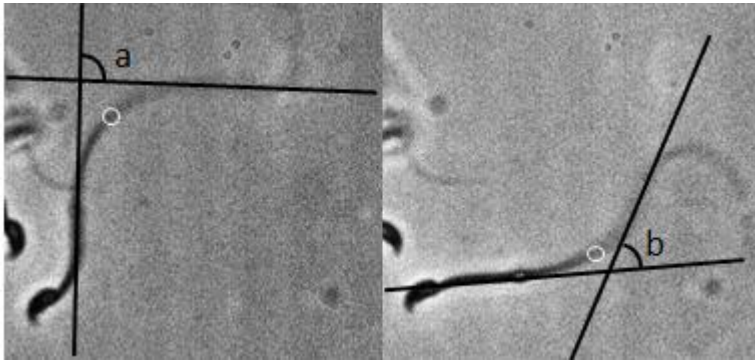

75

76 (B) Shear angle

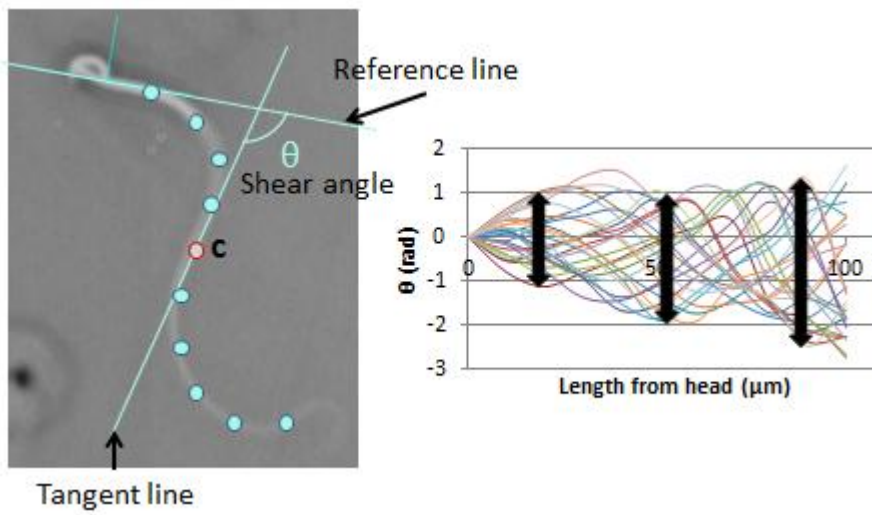

77

78 Figure 8: Methods for analysis of flagellar movement

79

80
